# Supplementary material for: Copper-catalyzed oxidative cascade coupling of N-alkyl-N-phenylacrylamides with aryl aldehydes
Source: Royal Society of Chemistry journal article supplement (doi:10.1039/c3ra46915h), 2014-01-01

# Supporting Information

## Copper-Catalyzed Oxidative Cascade Coupling of *N*-Alkyl-*N*-phenylacrylamides with Aryl Aldehydes

Weiwei Gong,<sup>a</sup> Lei Xu,<sup>a</sup> Tao, Ji,<sup>a</sup> Ping Xie,<sup>b</sup> Xueyong, Qi,<sup>a</sup> Charles U. Pittman Jr.,<sup>c</sup> Aihua Zhou<sup>a,\*</sup>

<sup>a</sup> Pharmacy School, Jiangsu University, Xuefu Road 301, Zhenjiang, Jiangsu 212013, People's Republic of China

<sup>b</sup> Scientific Information Research Institute, Jiangsu University (Library), Xuefu Road 301, Zhenjiang, Jiangsu, 212013, People's Republic of China

<sup>c</sup> Mississippi State University, Mississippi State, MS 39762, American

Email: ahz@ujs.edu.cn

### List of contents

|                                                                                |      |
|--------------------------------------------------------------------------------|------|
| General experimental Methods.....                                              | 1    |
| General procedure for the synthesis of compounds <b>3a-3i</b> .....            | 2-5  |
| <sup>1</sup> H and <sup>13</sup> C NMR spectra of compounds <b>3a-3i</b> ..... | 6-24 |

### Experimental section

**General:** All reactions were carried out under an atmosphere of nitrogen; stirring was achieved with an oven-dried magnetic stirring bar. Solvents were purified by standard methods unless otherwise noted. Commercially available reagents were purchased from Aladdin Company in China and used throughout without further purification other than those detailed below. Flash column chromatography was performed on silica gel (200-300 mesh). All reactions were monitored by TLC analysis. Deuterated solvents were purchased from Cambridge Isotope laboratories. <sup>1</sup>H and <sup>13</sup>C NMR spectra were recorded on a Bruker DRX-400 spectrometer operating at 400 MHz and 100 MHz respectively. Mass spectrometry (LC-MS) was recorded on a LXQ Spectrometer (Thermo Scientific) operating on ESI (MeOH as a solvent)

#### General procedure for the synthesis of compounds **3a-i**

*N*-Methyl-*N*-phenylacrylamide (2.0 mmol, 1.0 equiv) was added to a dried flask, followed by the addition of CuCl<sub>2</sub> (0.4 mmol, 0.2 equiv), benzaldehyde (7.0 mmol, 3.5 equiv), then aqueous TBHP (2.5 equiv., 70 wt% in water) was injected into the flask in two portions under N<sub>2</sub>. The reaction mixture was stirred at 90 °C for 6 hrs; another half portion of TBHP was

injected into the flask. The reaction was stirred for another 12 hrs. After the reaction was completed, the reaction mixture was concentrated under reduced pressure and purified by flash chromatography (Petroleum ether: EtOAc =12:1) to provide the title compound **3a** as a sticky solid in a 70% yield. The same procedure for catalyst screening and other compounds **3b-i**.

**1,3-Dimethyl-3-(2-oxo-2-phenylethyl)indolin-2-one**

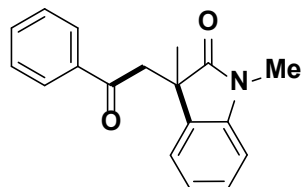

**3a**

**<sup>1</sup>H-NMR** (CDCl<sub>3</sub>, 400MHz): δ (ppm) 7.86-6.91 (aromatic H, 9H), 3.72 (d, *J*=16.2 Hz, 1H), 3.70 (d, *J*=16.2 Hz, 1H), 3.33 (s, 3H), 1.46 (s, 3H); **<sup>13</sup>C-NMR** (CDCl<sub>3</sub>, 100 Hz): 196.2, 180.6, 143.9, 136.4, 133.8, 133.2, 128.5, 127.9, 127.8, 122.2, 121.8, 108.2, 46.0, 24.9; **IR**: 2962, 2926, 2853, 1713, 1637, 737, 700 cm<sup>-1</sup>; **MS** (ESI) *m/z* calculated for C<sub>18</sub>H<sub>17</sub>NNaO<sub>2</sub> 302.12, found 302.36

**1,3-Dimethyl-3-(2-oxo-2-(4-methylphenyl)ethyl)indolin-2-one**

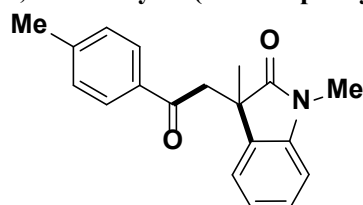

**3b**

**<sup>1</sup>H-NMR** (CDCl<sub>3</sub>, 400MHz): δ (ppm) 7.77-6.90 (aromatic H, 8H), 3.70 (d, *J*=16.2 Hz, 1H), 3.66 (d, *J*=16.2 Hz, 1H), 3.33 (s, 3H), 2.37 (s, 3H), 1.46 (s, 3H); **<sup>13</sup>C-NMR** (CDCl<sub>3</sub>, 100Hz): 195.8, 180.6, 143.9, 143.8, 134.0, 133.9, 129.2, 128.1, 122.2, 121.8, 108.2, 45.9, 45.3, 26.5, 24.9, 21.6; **IR**: 2962, 2924, 2851, 1712, 1614, 735, 701 cm<sup>-1</sup>; **MS** (ESI) *m/z* calculated for C<sub>19</sub>H<sub>19</sub>NNaO<sub>2</sub> 316.13, found 316.36.

**3-(2-(4-Methoxyphenyl)-2-oxoethyl)-1,3-Dimethylindolin-2-one**

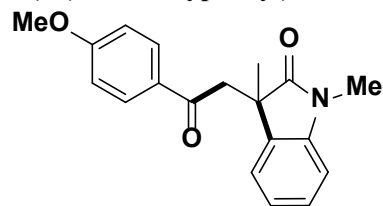

**3c**

**<sup>1</sup>H-NMR** (CDCl<sub>3</sub>, 400MHz): δ (ppm) 7.84-6.85 (aromatic H, 8H), 3.82 (s, 3H), 3.69 (d, *J*=18.0 Hz, 1H), 3.65 (d, *J*=18.0 Hz, 1H), 3.32 (s, 3H), 1.44 (s, 3H); **<sup>13</sup>C-NMR** (CDCl<sub>3</sub>, 100 Hz): 194.6, 180.8, 163.5, 143.8, 130.2, 129.3, 127.8, 121.8, 113.6, 108.1, 55.4, 45.7, 45.4, 26.5, 24.9; **IR**: 2965, 2926, 2852, 1709, 1601, 734, 700 cm<sup>-1</sup>; **MS** (ESI) *m/z* calculated for C<sub>19</sub>H<sub>19</sub>NNaO<sub>3</sub> 332.13, found 332.30.

**3-(2-(4-(*tert*-Butyl)phenyl)-2-oxoethyl)-1,3-Dimethylindolin-2-one**

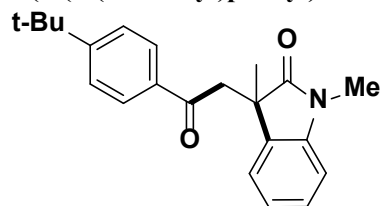

**3d**

**<sup>1</sup>H-NMR** (CDCl<sub>3</sub>, 400MHz): δ (ppm) 7.82-6.90 (aromatic H, 8H), 3.75 (d, *J*=17.6 Hz, 1H), 3.66 (d, *J*=17.6 Hz, 1H), 3.33 (s, 3H), 1.46 (s, 3H), 1.32 (s, 9H); **<sup>13</sup>C-NMR** (CDCl<sub>3</sub>, 100Hz): 195.8, 180.8, 156.9, 143.9, 139.3, 133.9, 128.0, 125.4, 122.2, 108.2, 45.9, 45.4, 31.1, 26.5, 24.9; **IR**: 2964, 2928, 2869, 1715, 1614, 734, 700 cm<sup>-1</sup>; **MS** (ESI) *m/z* calculated for C<sub>22</sub>H<sub>25</sub>NNaO<sub>2</sub> 358.18, found 358.28.

**1-Ethyl-3-methyl-3-(2-oxo-2-phenylethyl)indolin-2-one**

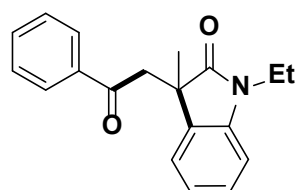

**3e**

**<sup>1</sup>H-NMR** (CDCl<sub>3</sub>, 400MHz): δ (ppm) 7.87-6.93 (aromatic H, 9H), 3.87 (m, 2H), 3.73 (d, *J*=17.6 Hz, 1H), 3.66 (d, *J*=17.6 Hz, 1H), 1.45 (s, 3H), 1.37 (t, *J*=8.0 Hz, 3H); **<sup>13</sup>C-NMR** (CDCl<sub>3</sub>, 100Hz): 196.0, 180.1, 142.9, 136.5, 134.0, 133.1, 128.0, 127.7, 126.5, 125.4, 121.9, 108.3, 45.9, 45.3, 34.8, 25.0, 12.4; **IR**: 2970, 2918, 2849, 1709, 1613, 738, 700 cm<sup>-1</sup>; **MS** (ESI) *m/z* calculated for C<sub>19</sub>H<sub>19</sub>NNaO<sub>2</sub> 316.13, 316.36.

**1-Ethyl-3-methyl-3-(2-oxo-2-(p-tolyl)ethyl)indolin-2-one**

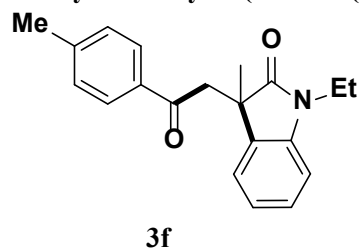

**<sup>1</sup>H-NMR** (CDCl<sub>3</sub>, 400MHz): δ (ppm) 7.77-6.92 (aromatic H, 8H), 3.86 (m, 2H), 3.72 (d, *J*=17.6 Hz, 1H), 3.63 (d, *J*=17.6 Hz, 1H), 2.38 (s, 3H), 1.44 (s, 3H), 1.37 (t, *J*=8.0 Hz, 3H); **<sup>13</sup>C-NMR** (CDCl<sub>3</sub>, 100Hz): 195.6, 180.2, 143.8, 143.0, 134.1, 129.4, 129.1, 128.4, 128.1, 127.7, 121.9, 108.4, 45.8, 45.3, 34.7, 25.0, 21.6, 12.4; **IR**: 2969, 2928, 2853, 1711, 1602, 736, 700 cm<sup>-1</sup>; **MS** (ESI) *m/z* calculated for C<sub>20</sub>H<sub>21</sub>NNaO<sub>2</sub> 330.15, found 330.29.

**1-Ethyl-3-(2-(4-methoxyphenyl)-2-oxoethyl)-3-methylindolin-2-one**

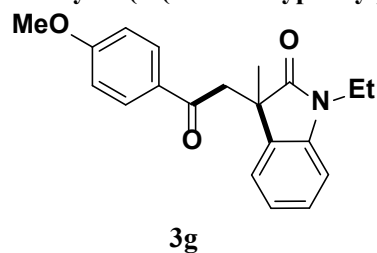

**<sup>1</sup>H-NMR** (CDCl<sub>3</sub>, 400MHz): δ (ppm) 7.85-6.86 (aromatic H, 8H), 3.84 (m, 3H), 3.65 (m, 2H), 1.44 (s, 3H), 1.36 (t, *J*=8.0 Hz, 3H); **<sup>13</sup>C-NMR** (CDCl<sub>3</sub>, 100 Hz): 195.6, 180.2, 143.8, 143.0, 134.1, 129.4, 129.1, 128.4, 128.1, 127.7, 121.9, 108.4, 45.8, 45.3, 34.7, 25.0, 21.6, 12.4;

**IR:** 2969, 2928, 2854, 1711, 1602, 736, 700  $\text{cm}^{-1}$ ; **MS** (ESI)  $m/z$  calculated for  $\text{C}_{20}\text{H}_{21}\text{NNaO}_3$  346.14, found 346.26.

**3-(2-(4-(*tert*-Butyl)phenyl)-2-oxoethyl)-1-ethyl-3-methylindolin-2-one**

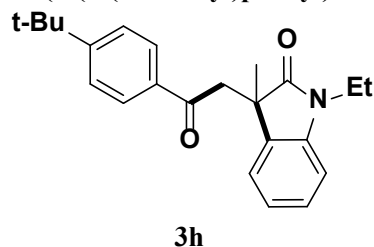

**$^1\text{H-NMR}$**  ( $\text{CDCl}_3$ , 400MHz):  $\delta$  (ppm) 7.82-6.90 (aromatic H, 8H), 3.84 (m, 2H), 3.72 (d,  $J=17.6$  Hz, 1H), 3.65 (d,  $J=17.6$  Hz, 1H), 1.45 (s, 3H), 1.33 (t,  $J=7.8$  Hz, 3H);  **$^{13}\text{C-NMR}$**  ( $\text{CDCl}_3$ , 100 Hz): 195.6, 180.2, 143.8, 156.7, 142.9, 134.1, 128.4, 128.0, 127.7, 122.0, 121.8, 108.2, 45.8, 45.3, 35.1, 34.7, 31.1, 25.4, 12.4; **IR:** 2965, 2931, 2870, 1713, 1612, 742, 700  $\text{cm}^{-1}$ ; **MS** (ESI)  $m/z$  calculated for  $\text{C}_{23}\text{H}_{27}\text{NNaO}_2$ , 372.19, found 372.34.

**1-*iso*-Propyl-3-(2-(4-methoxyphenyl)-2-oxoethyl)-3-methylindolin-2-one**

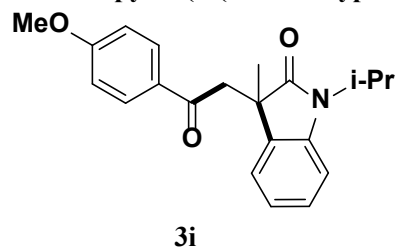

**$^1\text{H-NMR}$**  ( $\text{CDCl}_3$ , 400MHz):  $\delta$  (ppm) 7.86-6.86 (aromatic H, 8H), 4.74 (m, 1H), 3.84 (s, 3H), 3.65 (d,  $J=17.6$  Hz, 1H), 3.63 (d,  $J=17.6$  Hz, 1H), 1.60 (d,  $J=6.8$  Hz, 3H), 1.58 (d,  $J=6.8$  Hz, 3H), 1.43 (s, 3H);  **$^{13}\text{C-NMR}$**  ( $\text{CDCl}_3$ , 100 Hz): 195.6, 180.2, 163.4, 142.5, 134.4, 130.3, 129.7, 128.0, 127.4, 122.0, 113.6, 109.9, 55.4, 45.8, 45.1, 25.2, 19.0; **IR:** 2965, 2932, 2870, 1712, 1608, 739, 700  $\text{cm}^{-1}$ ; **MS** (ESI)  $m/z$  calculated for  $\text{C}_{21}\text{H}_{23}\text{NNaO}_3$  360.16, found 360.36.

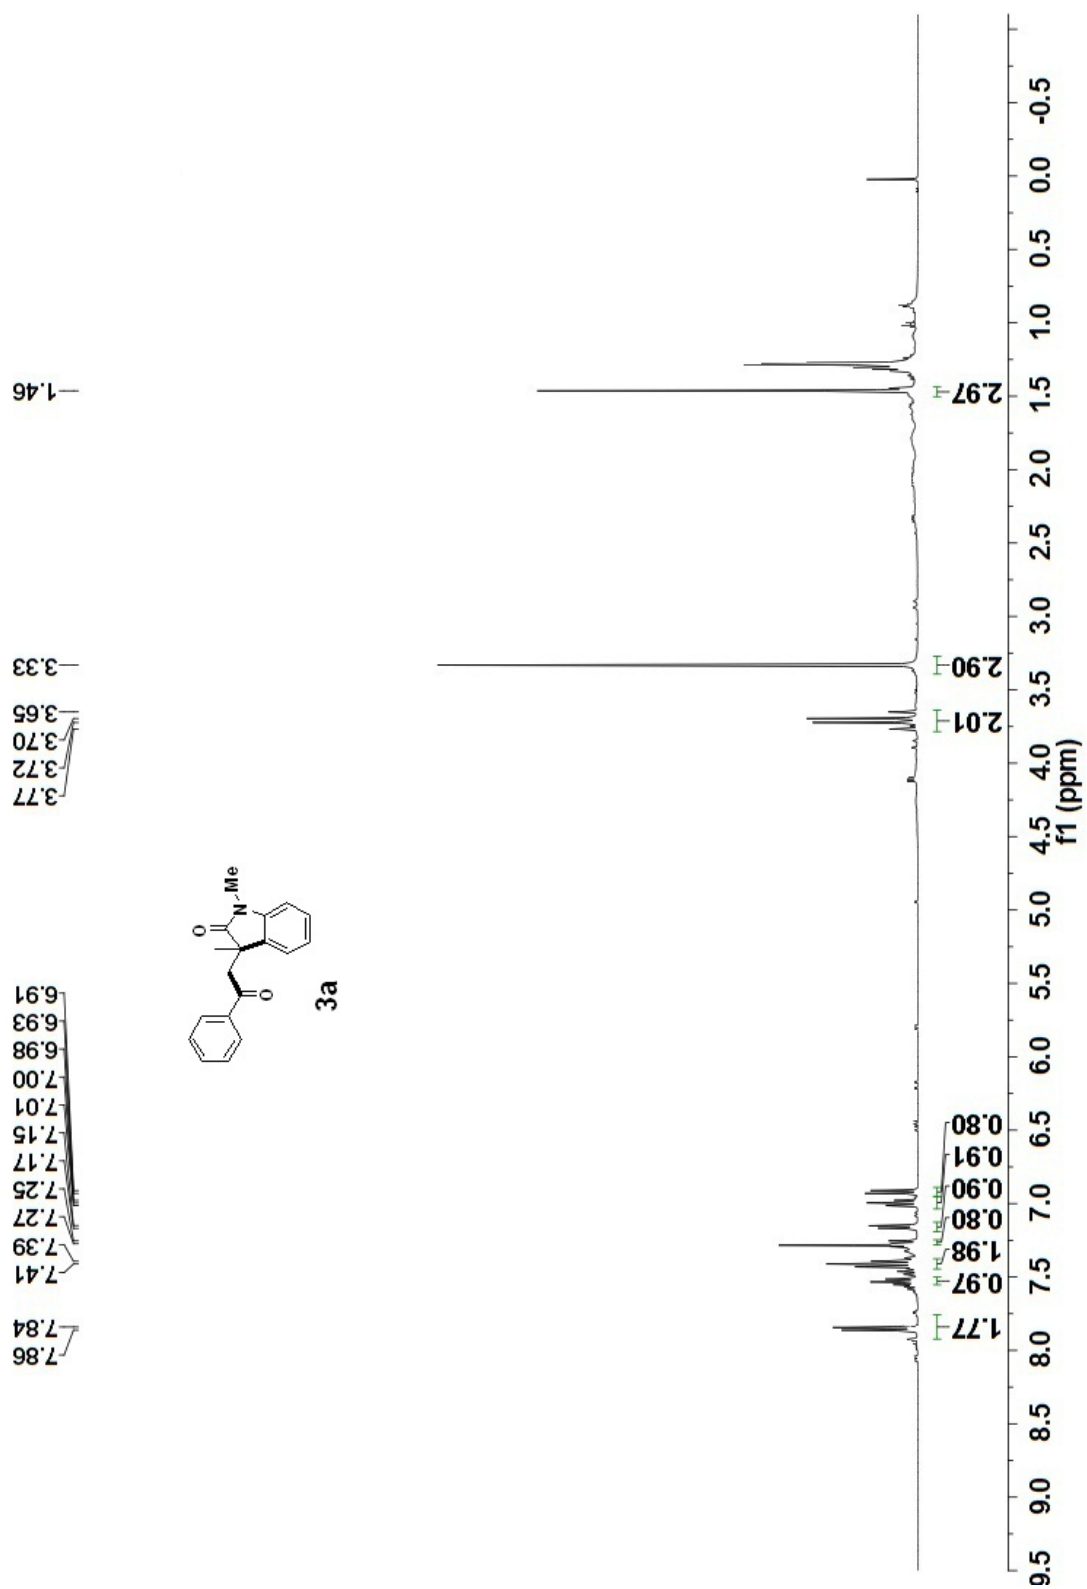

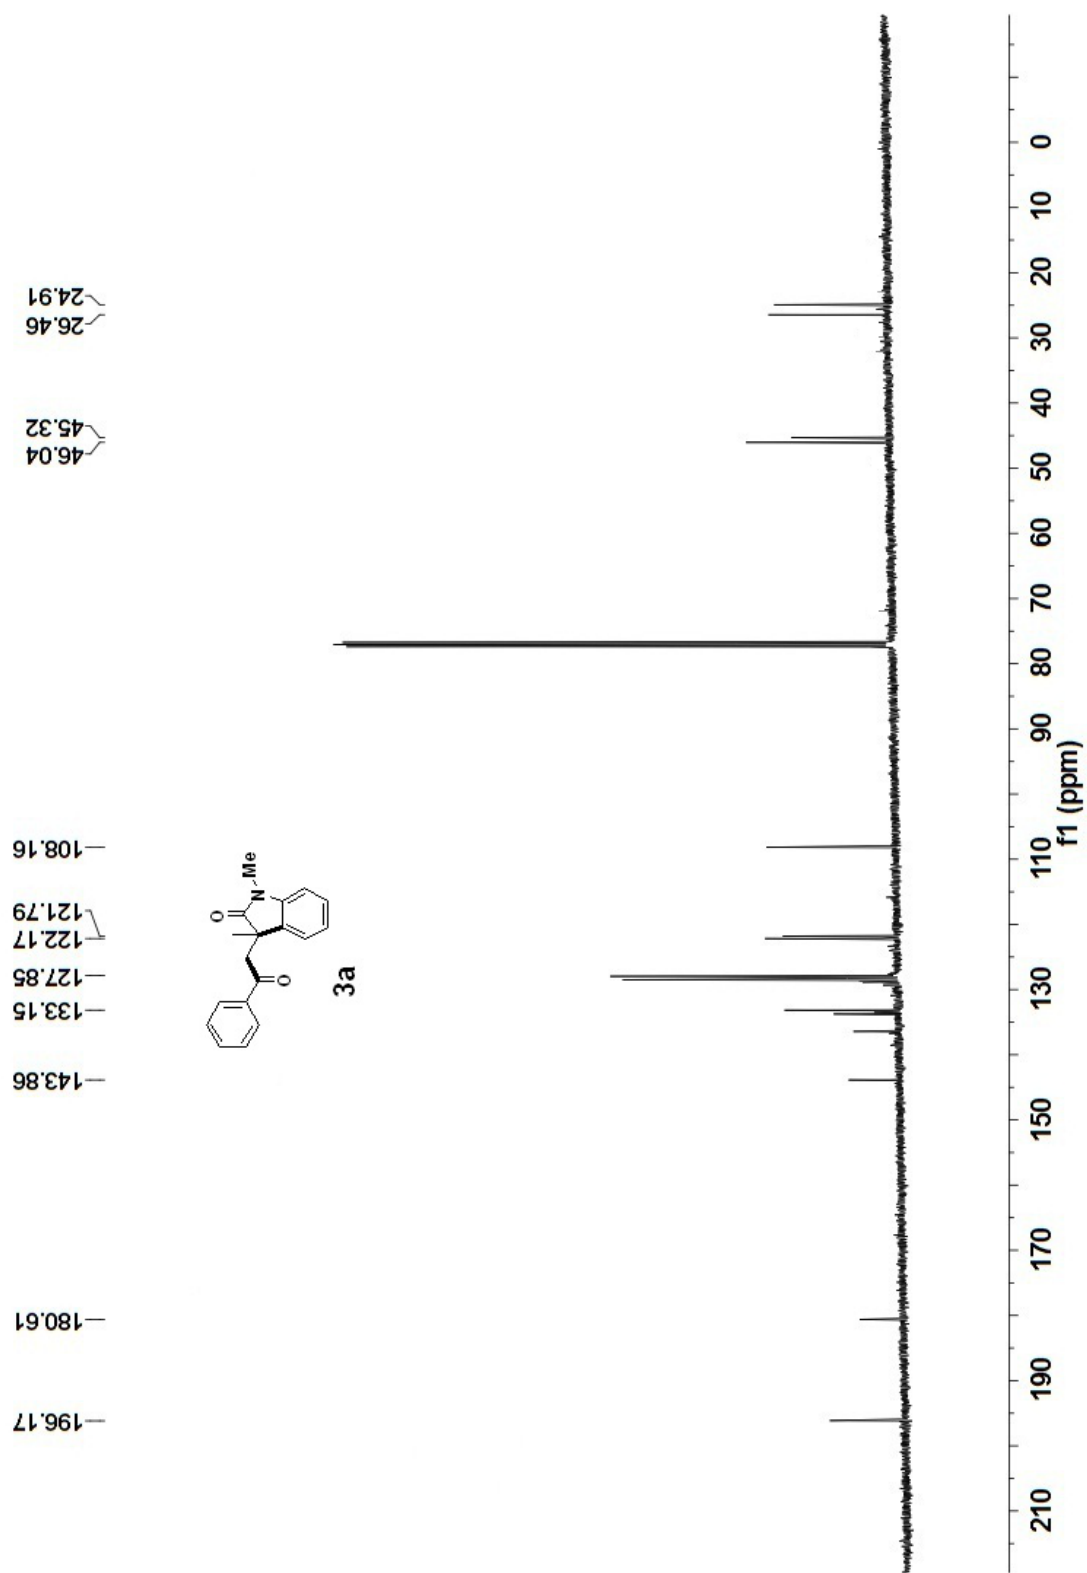

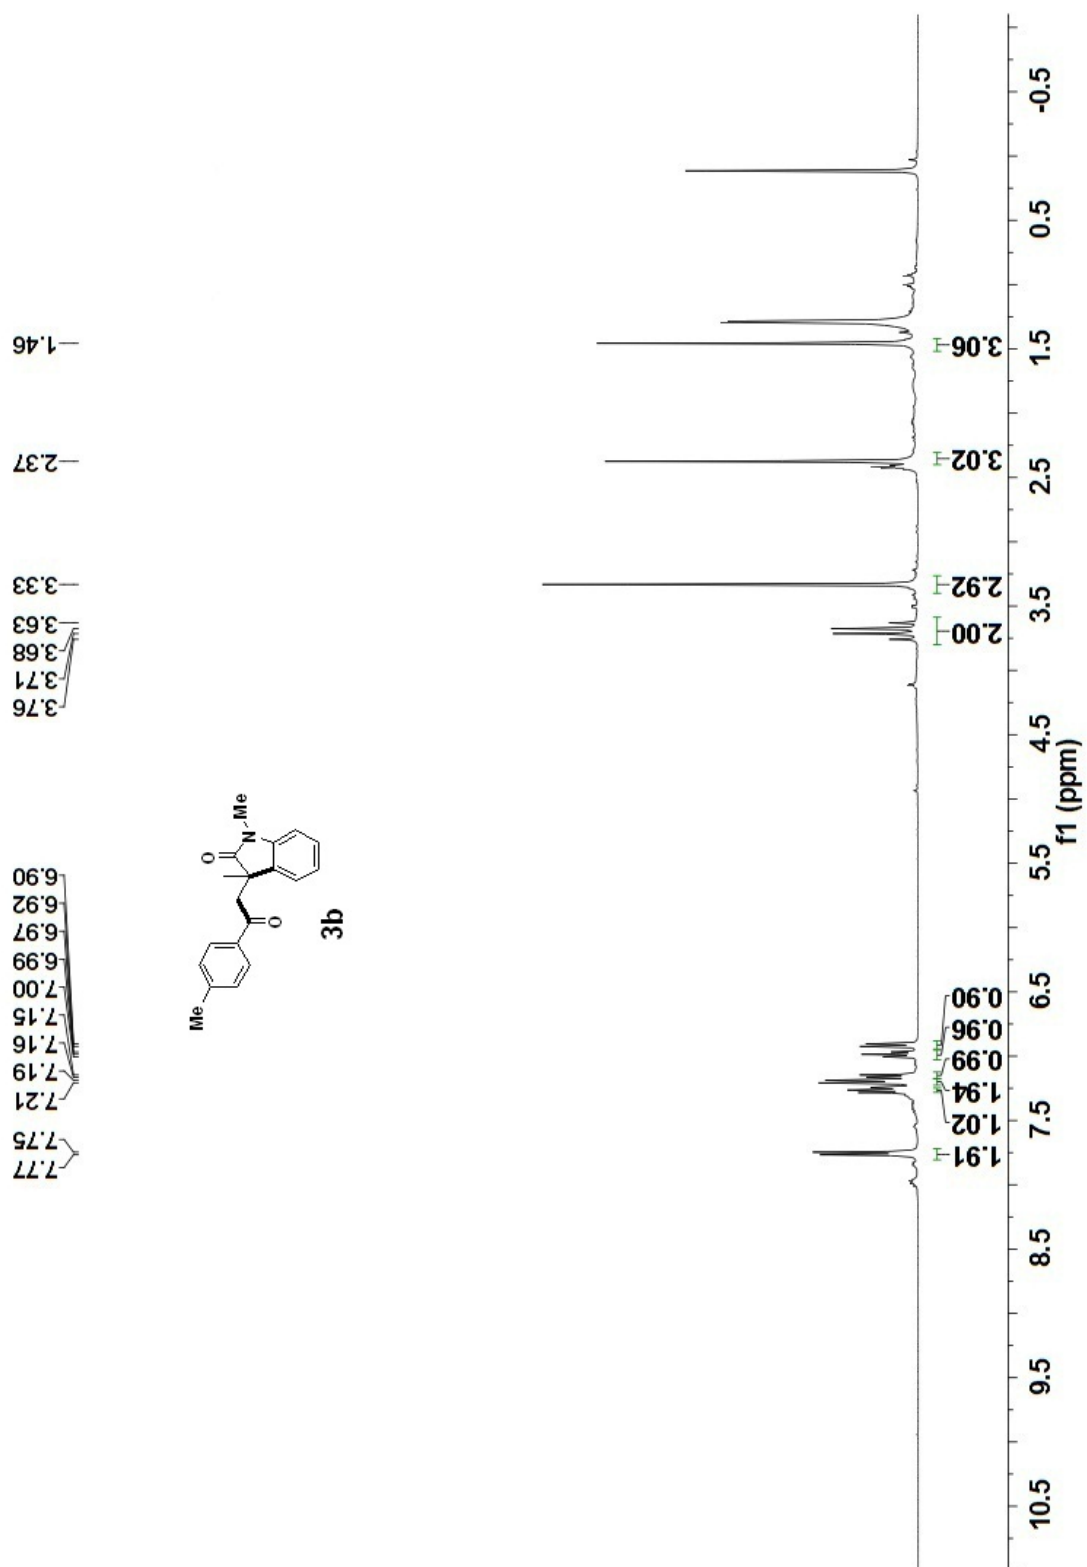



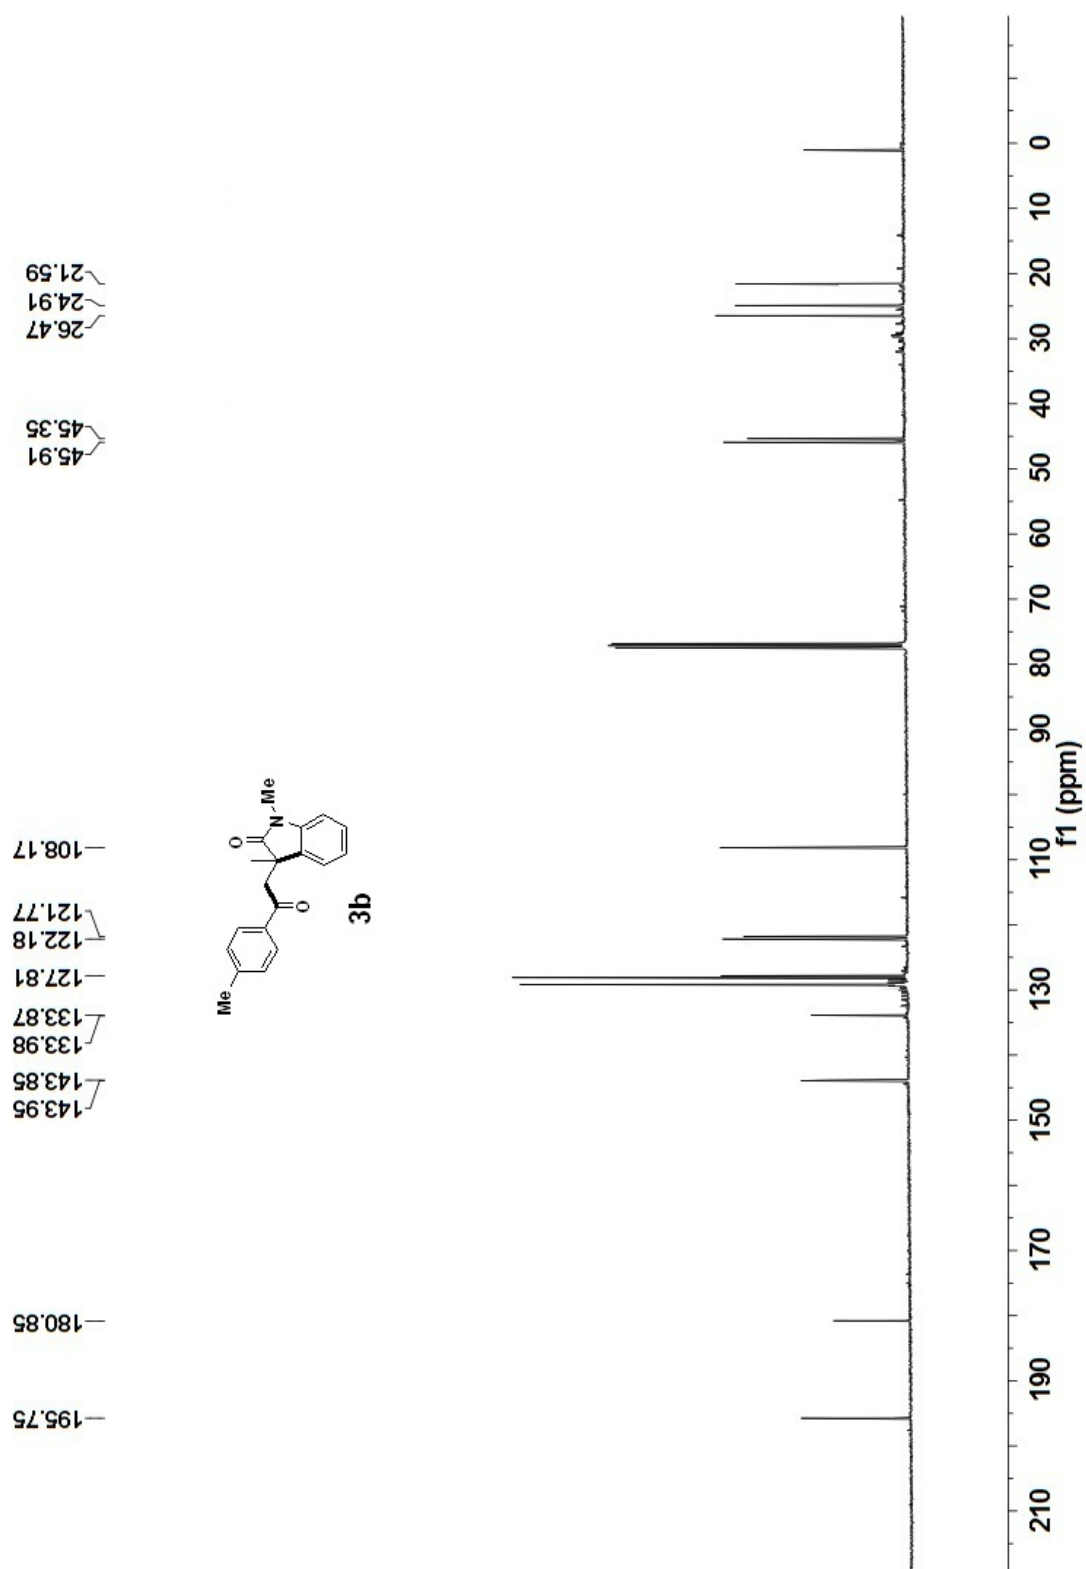

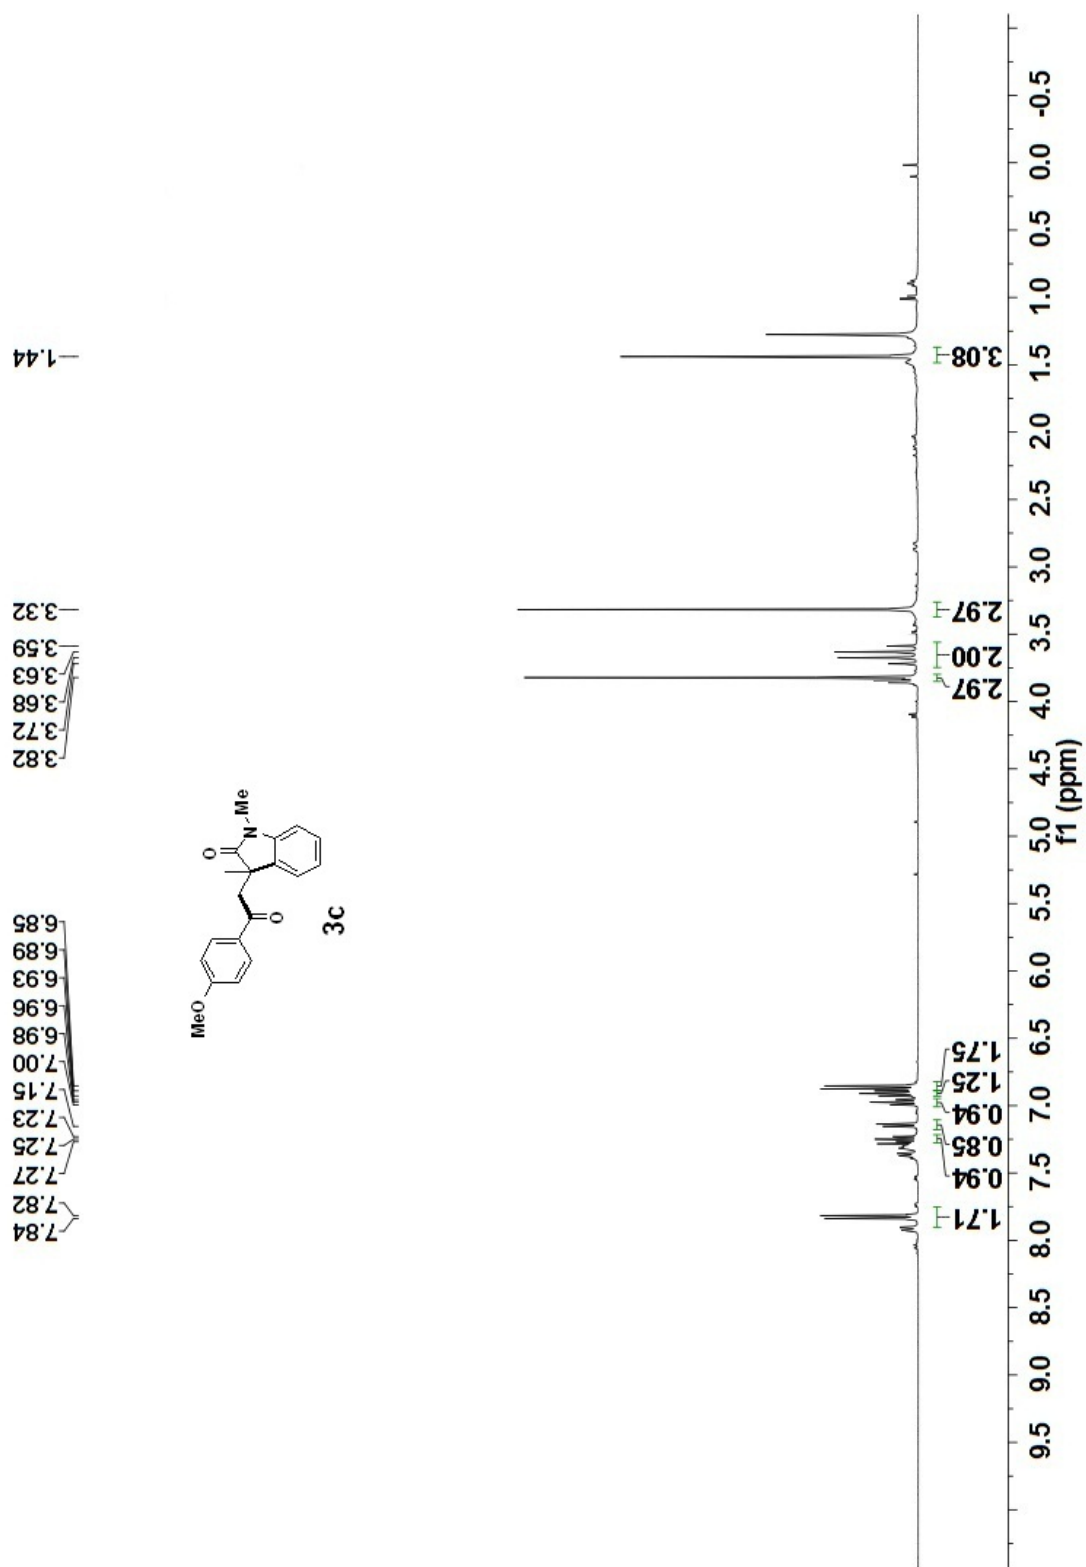

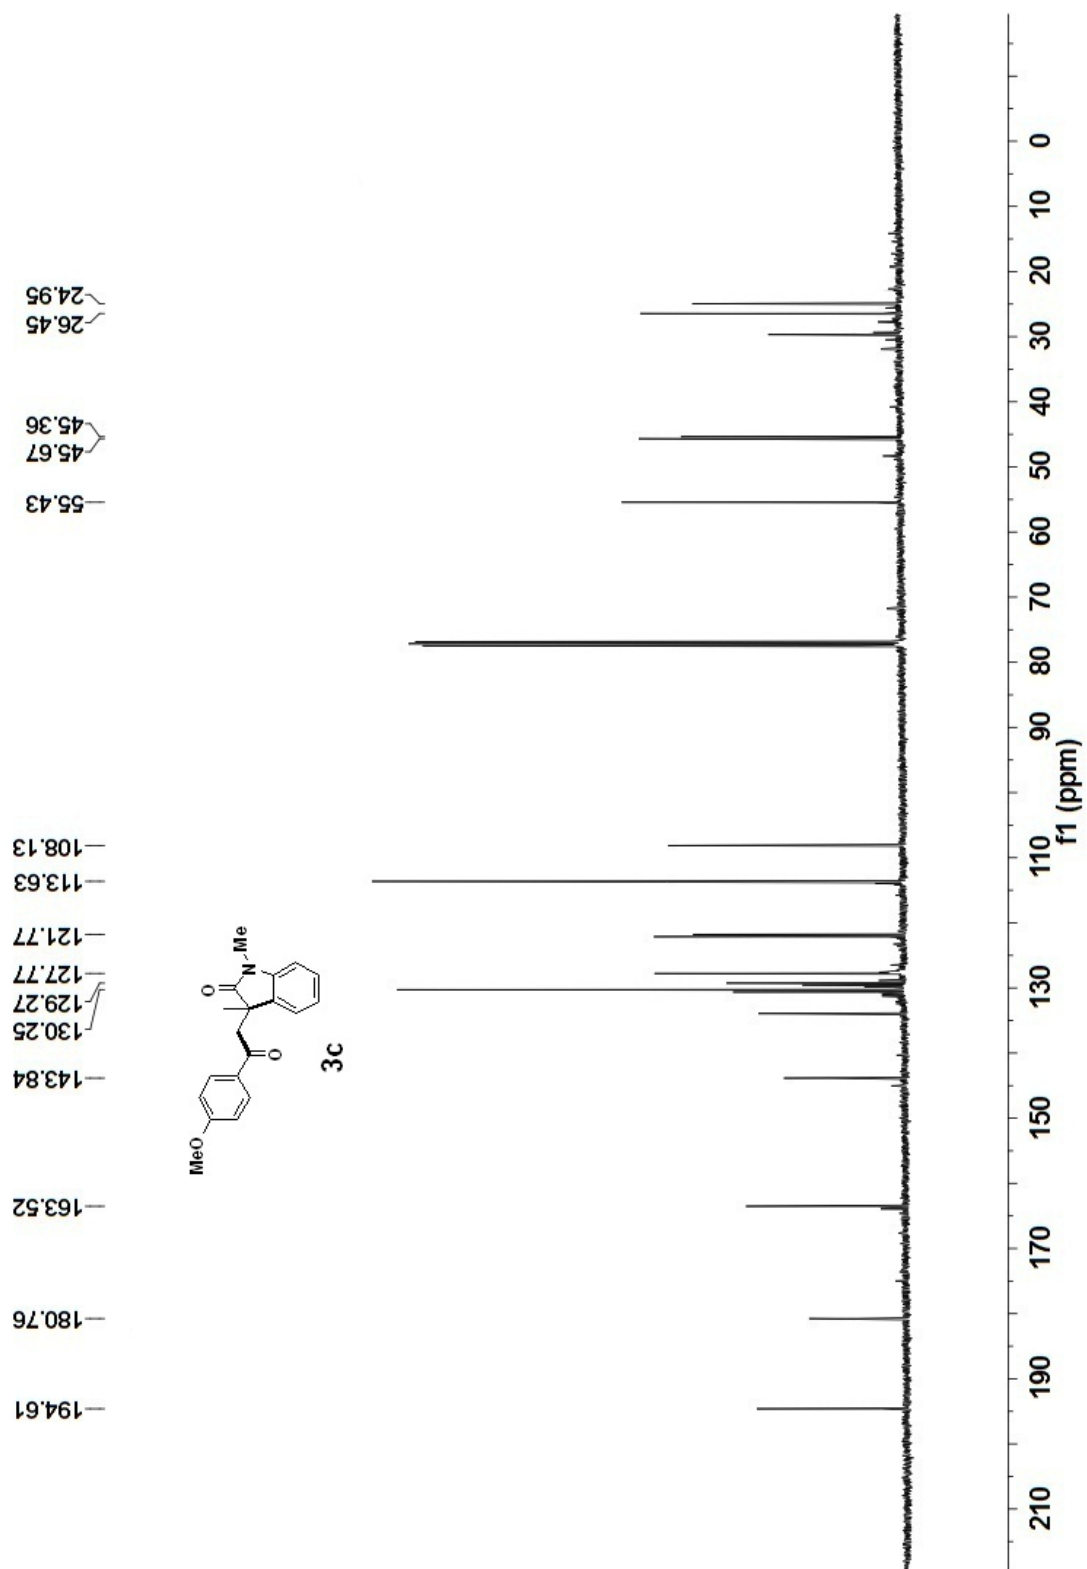

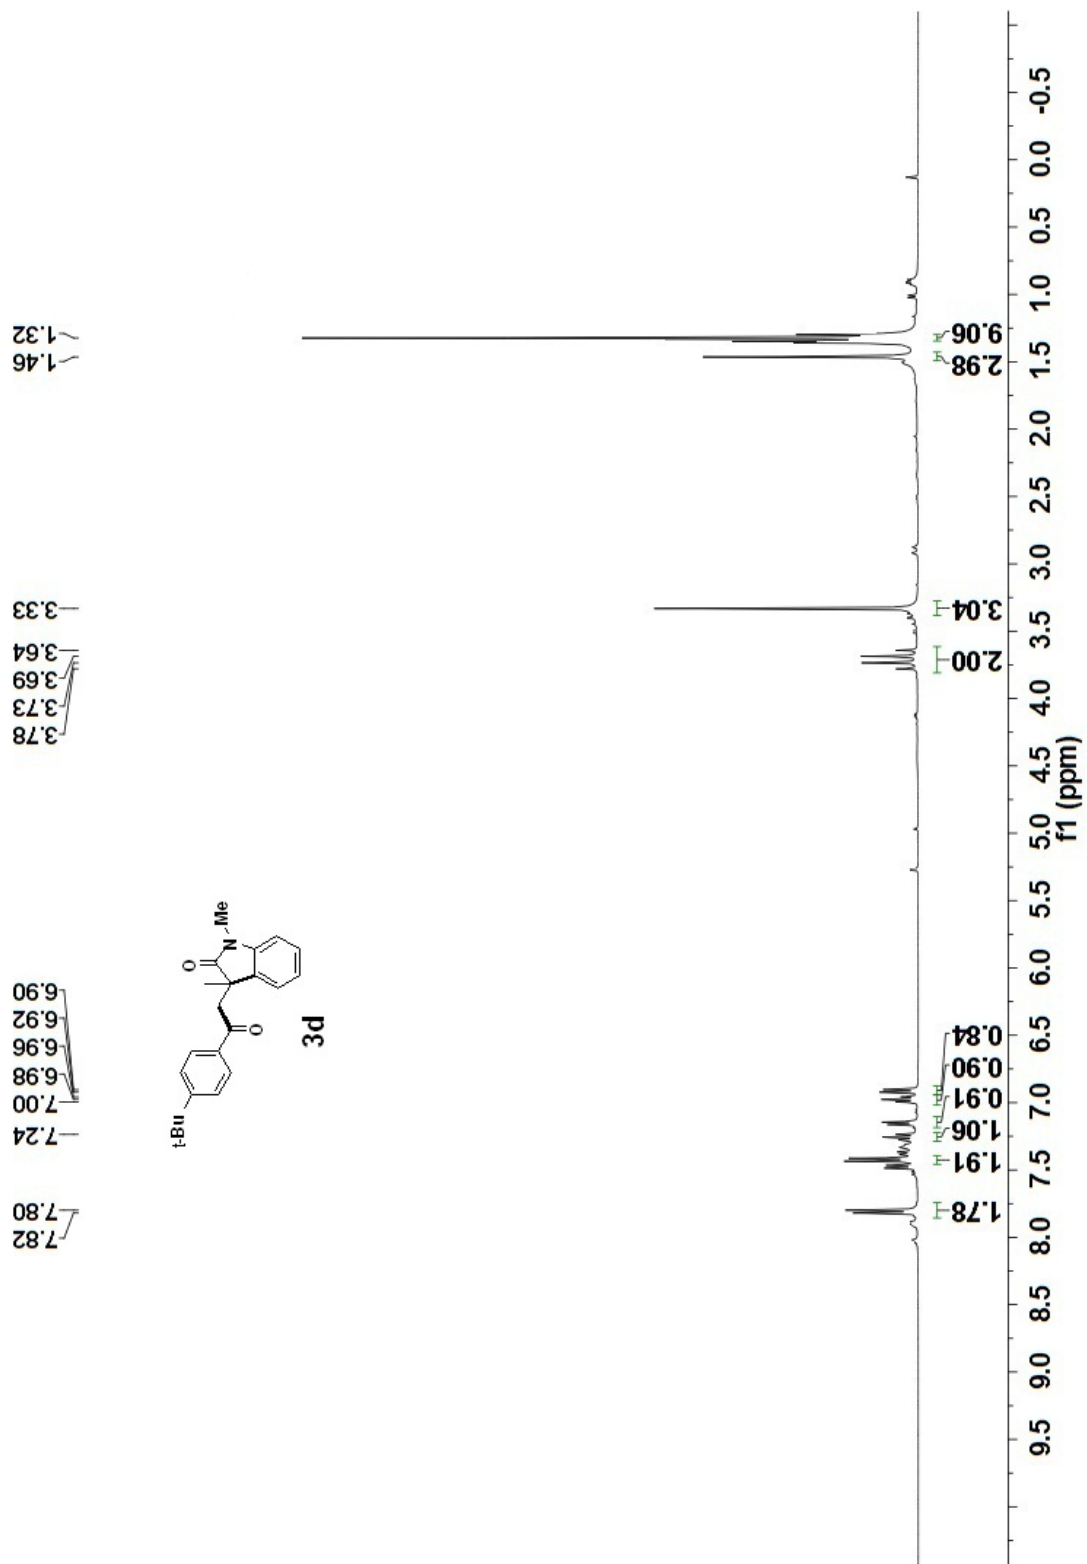

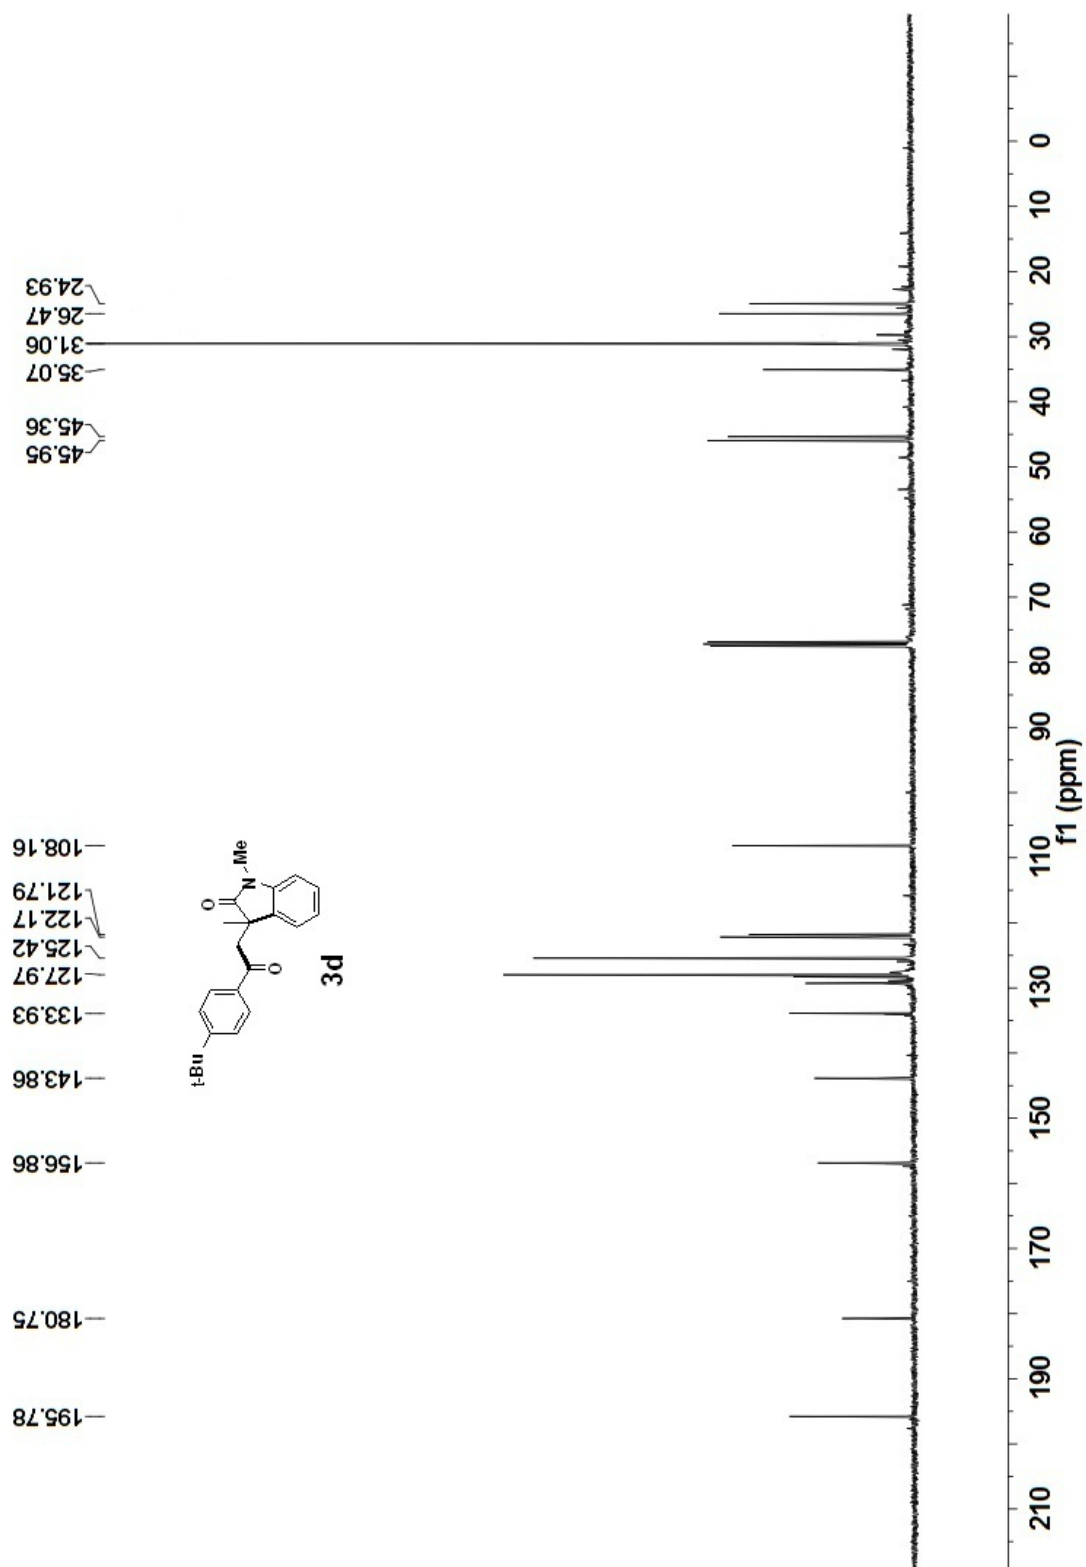

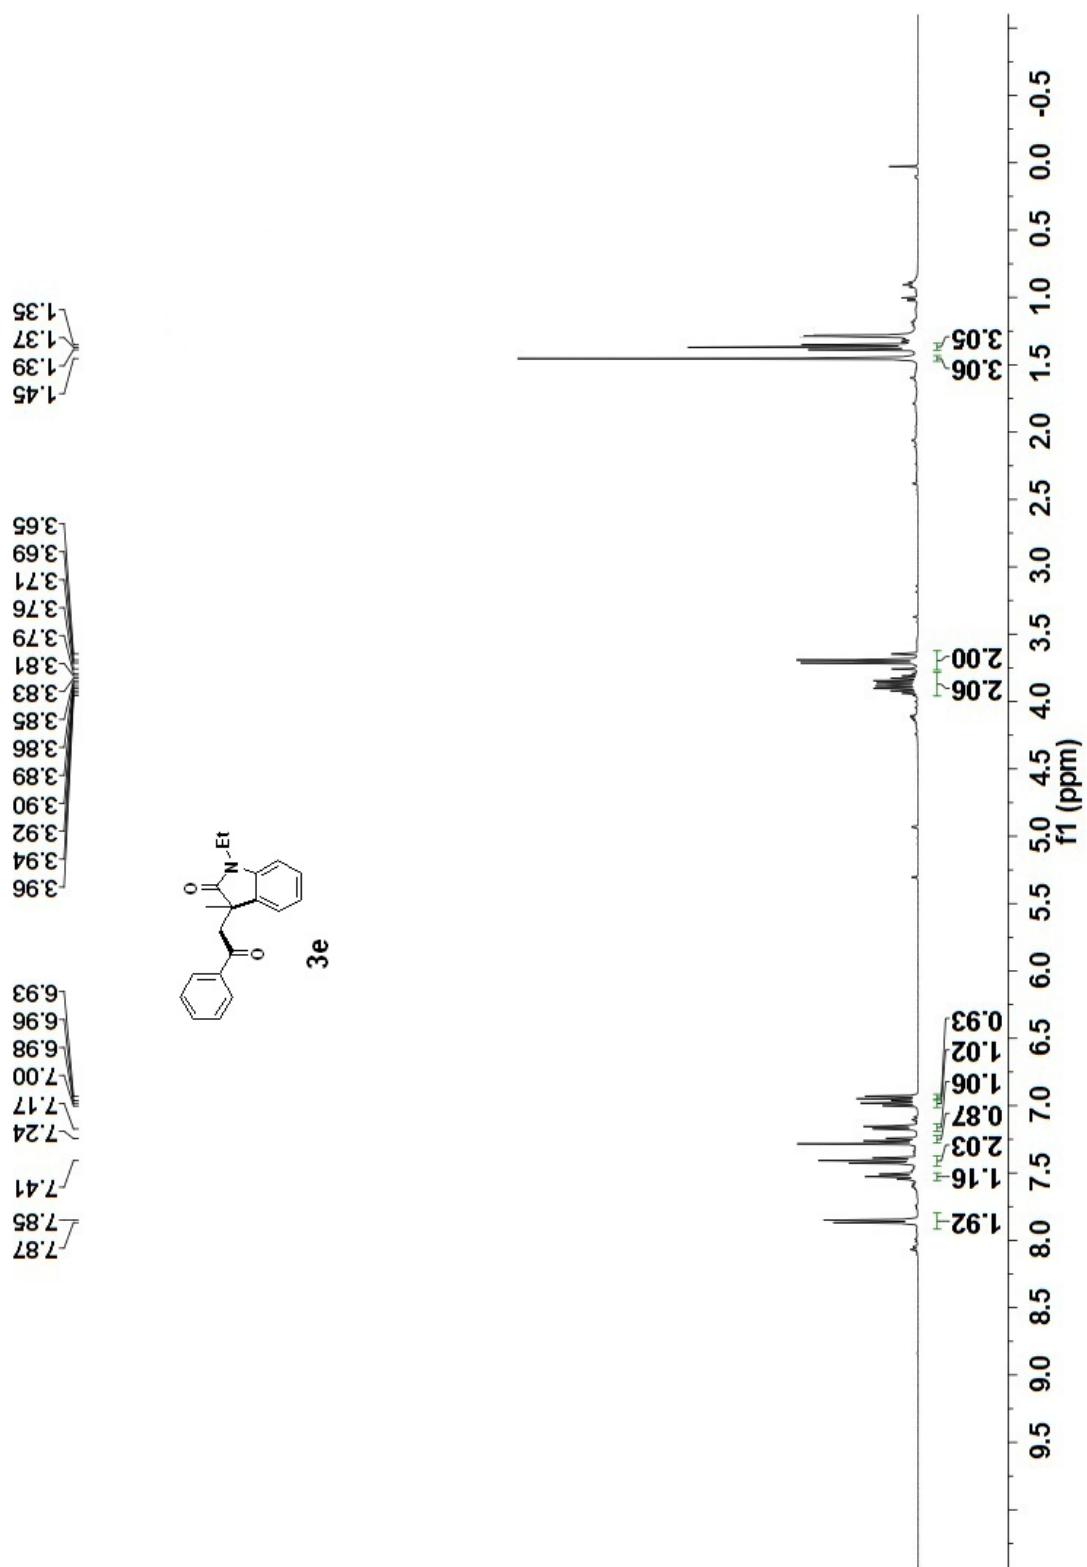

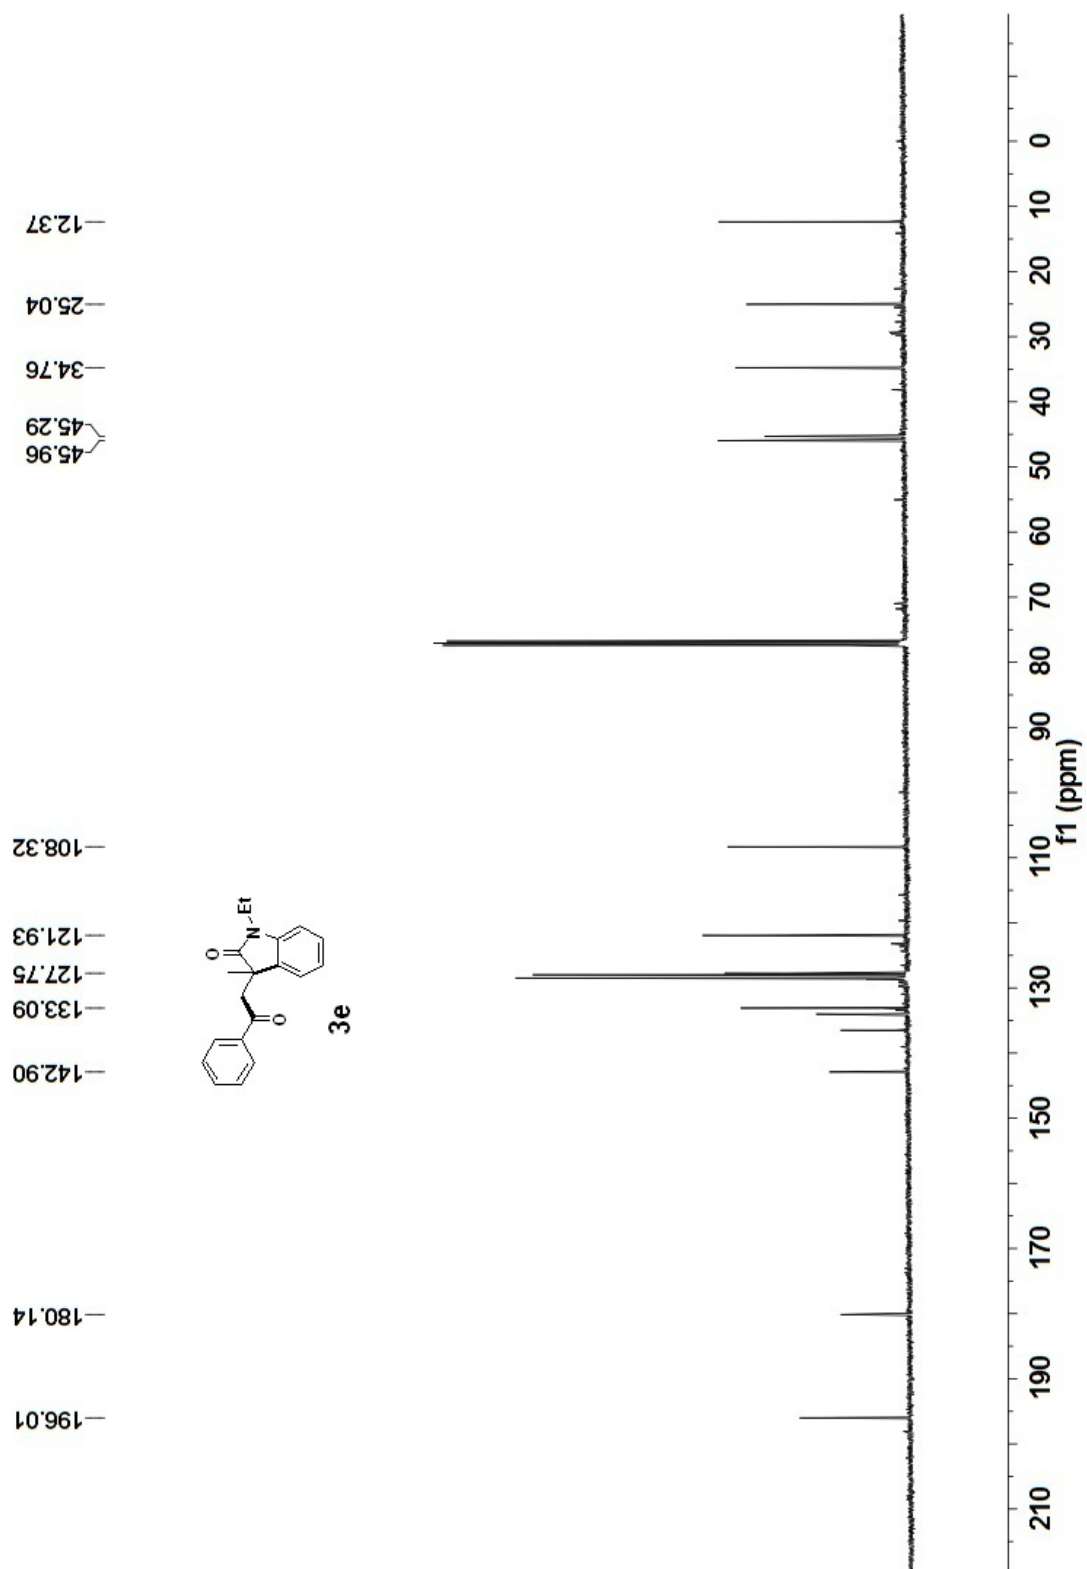

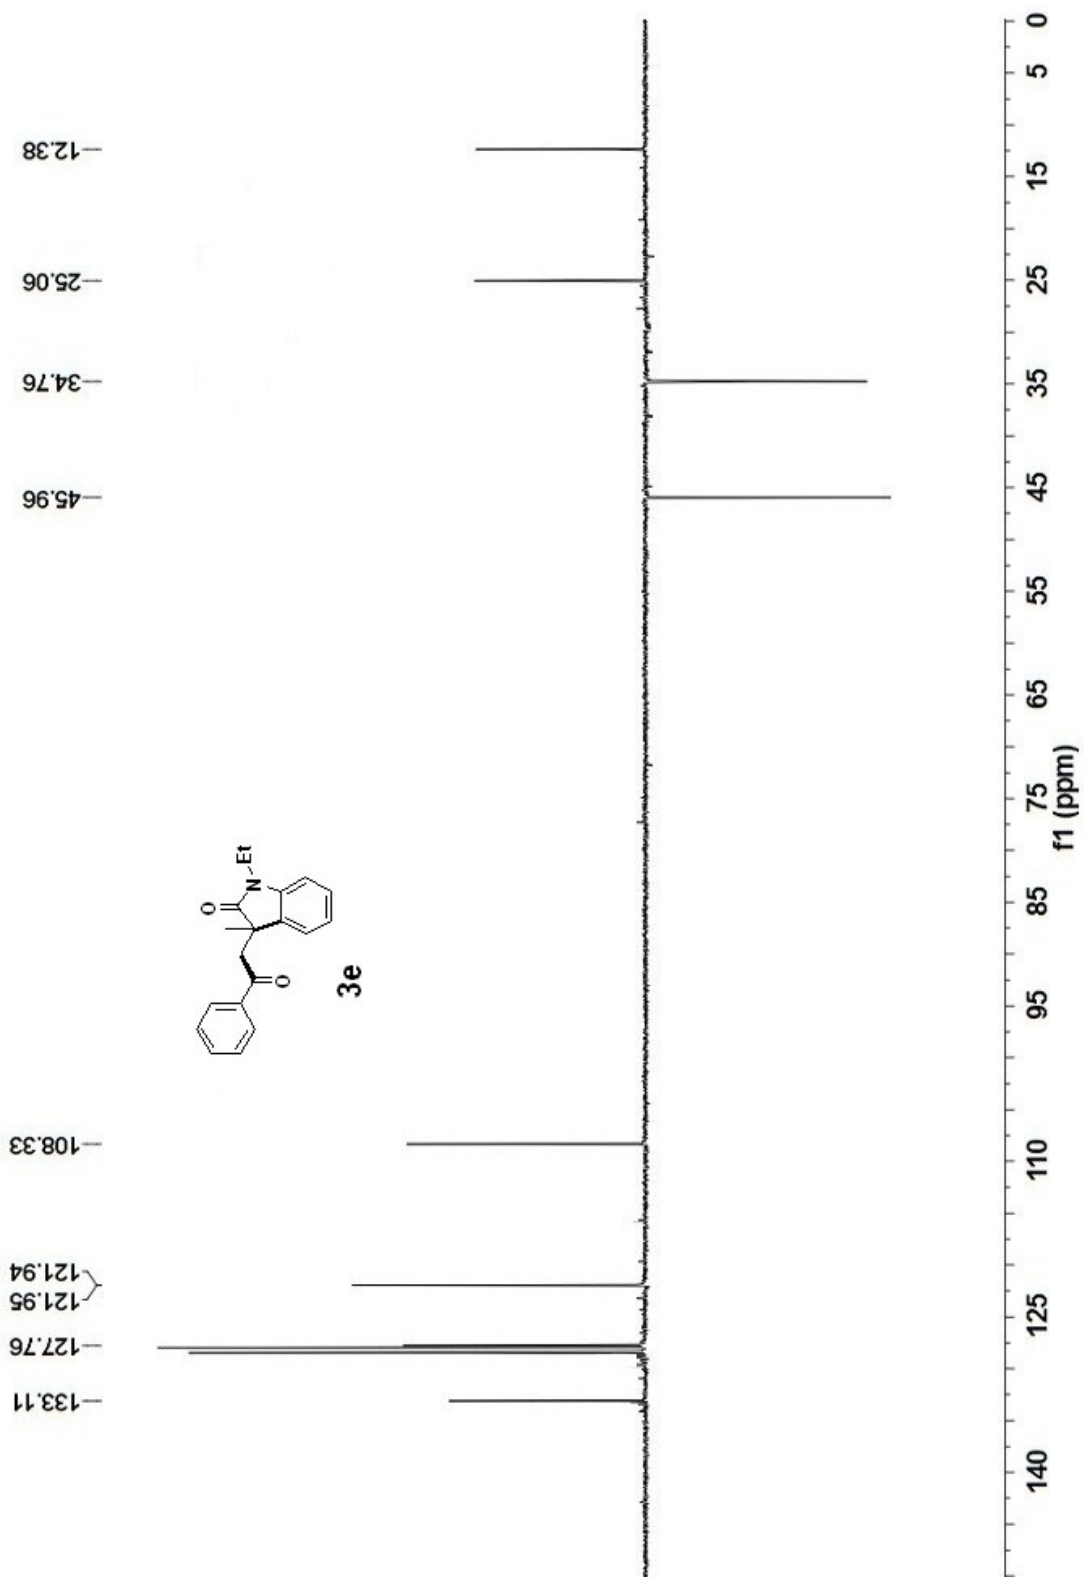



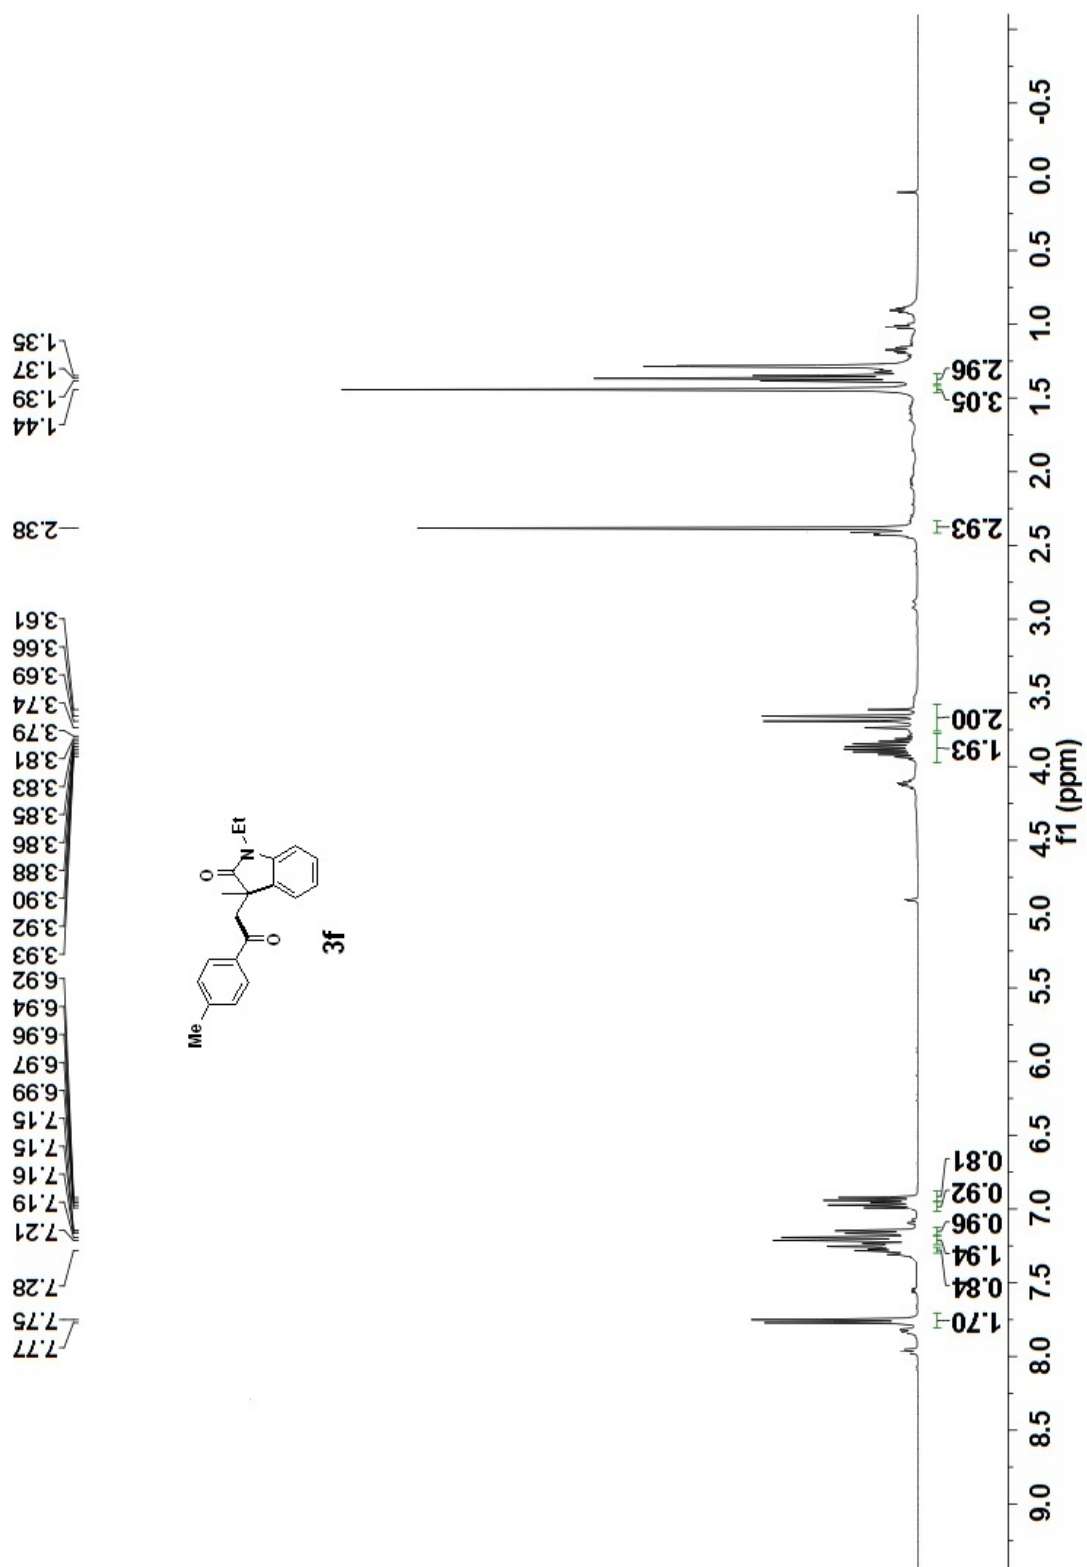

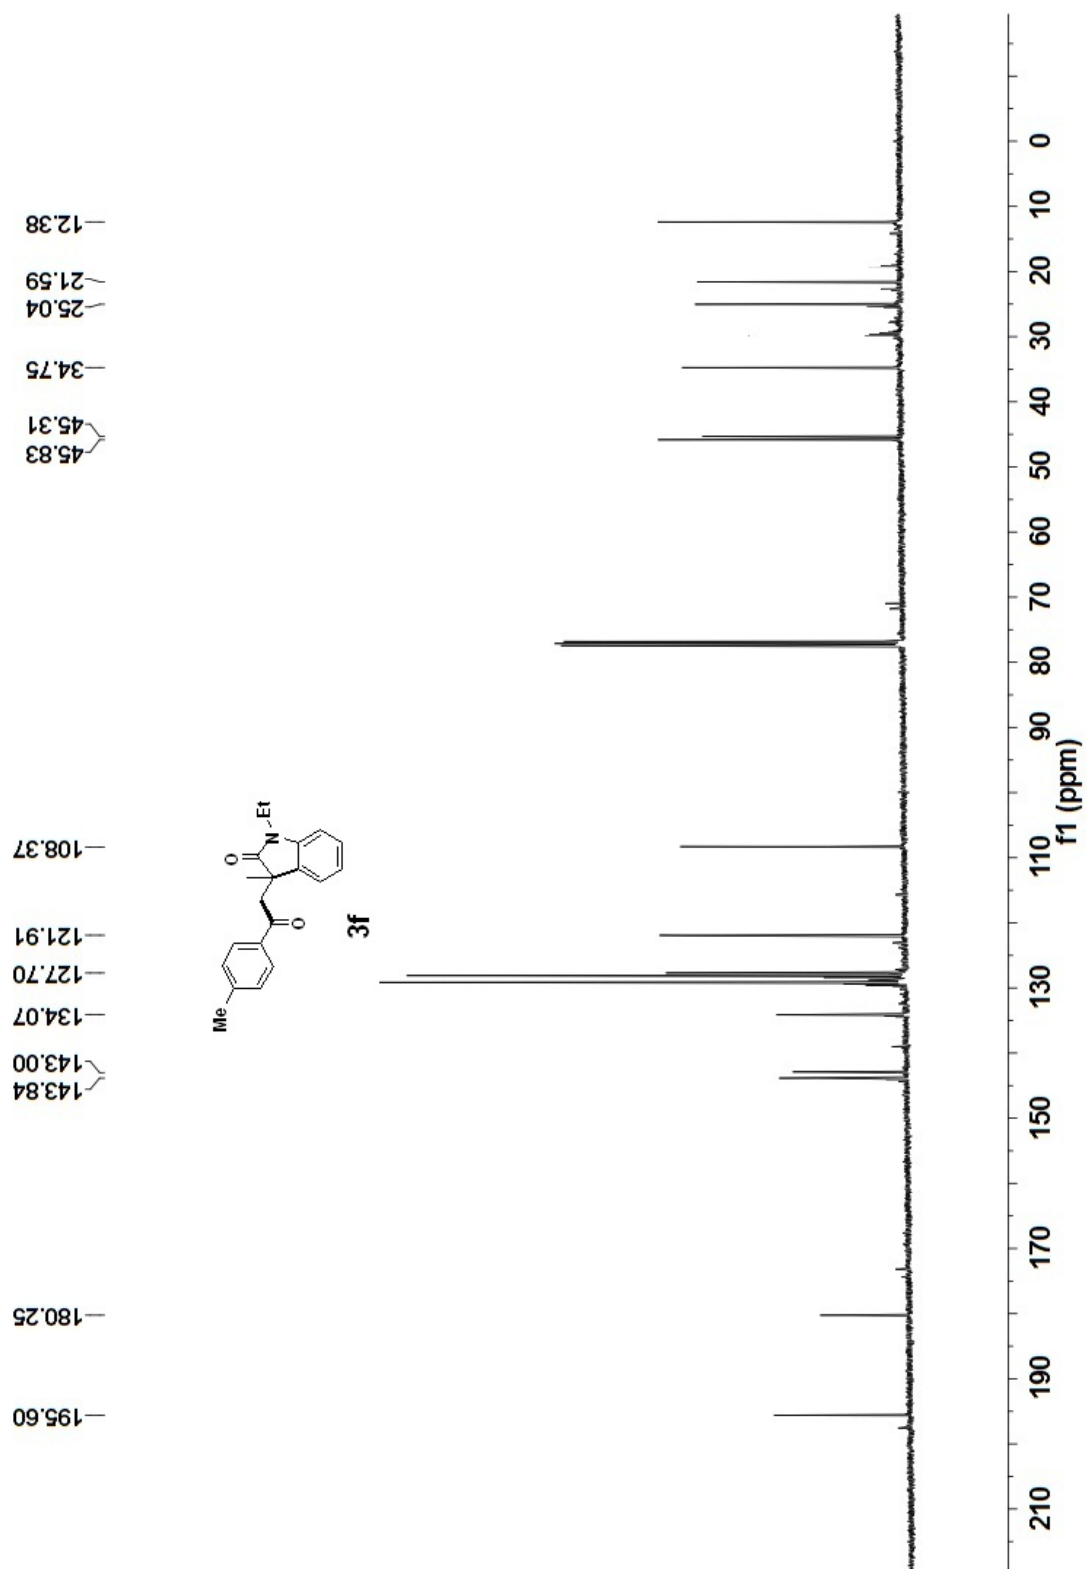

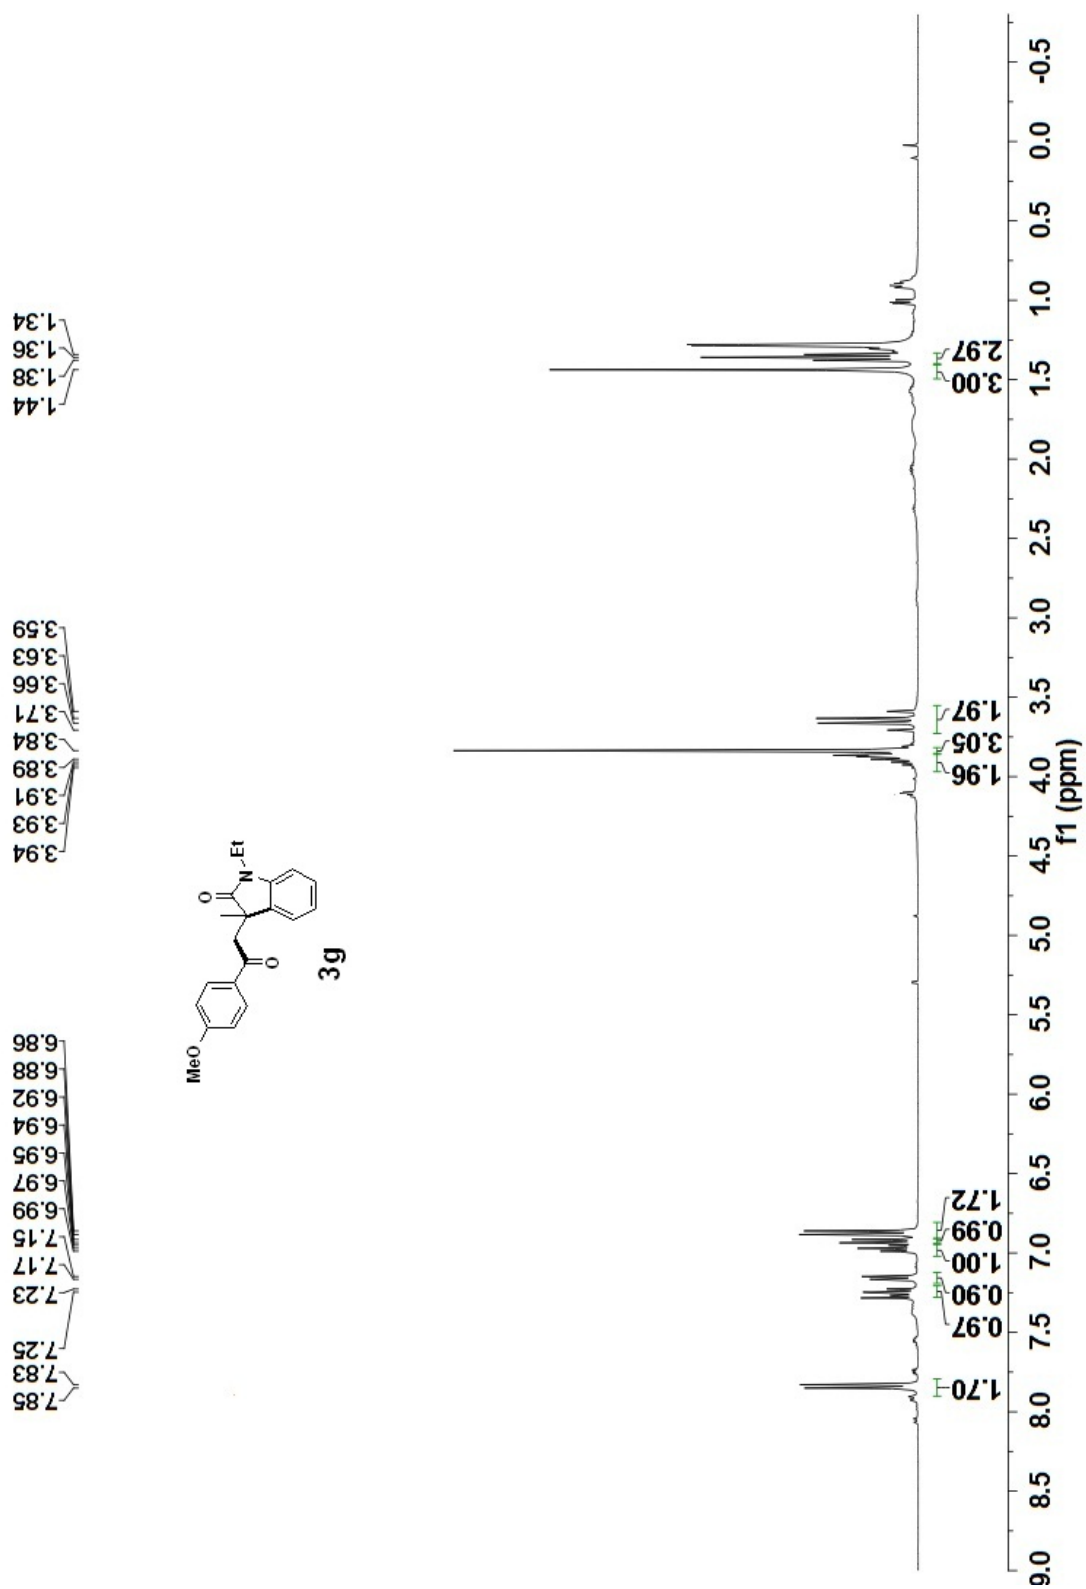

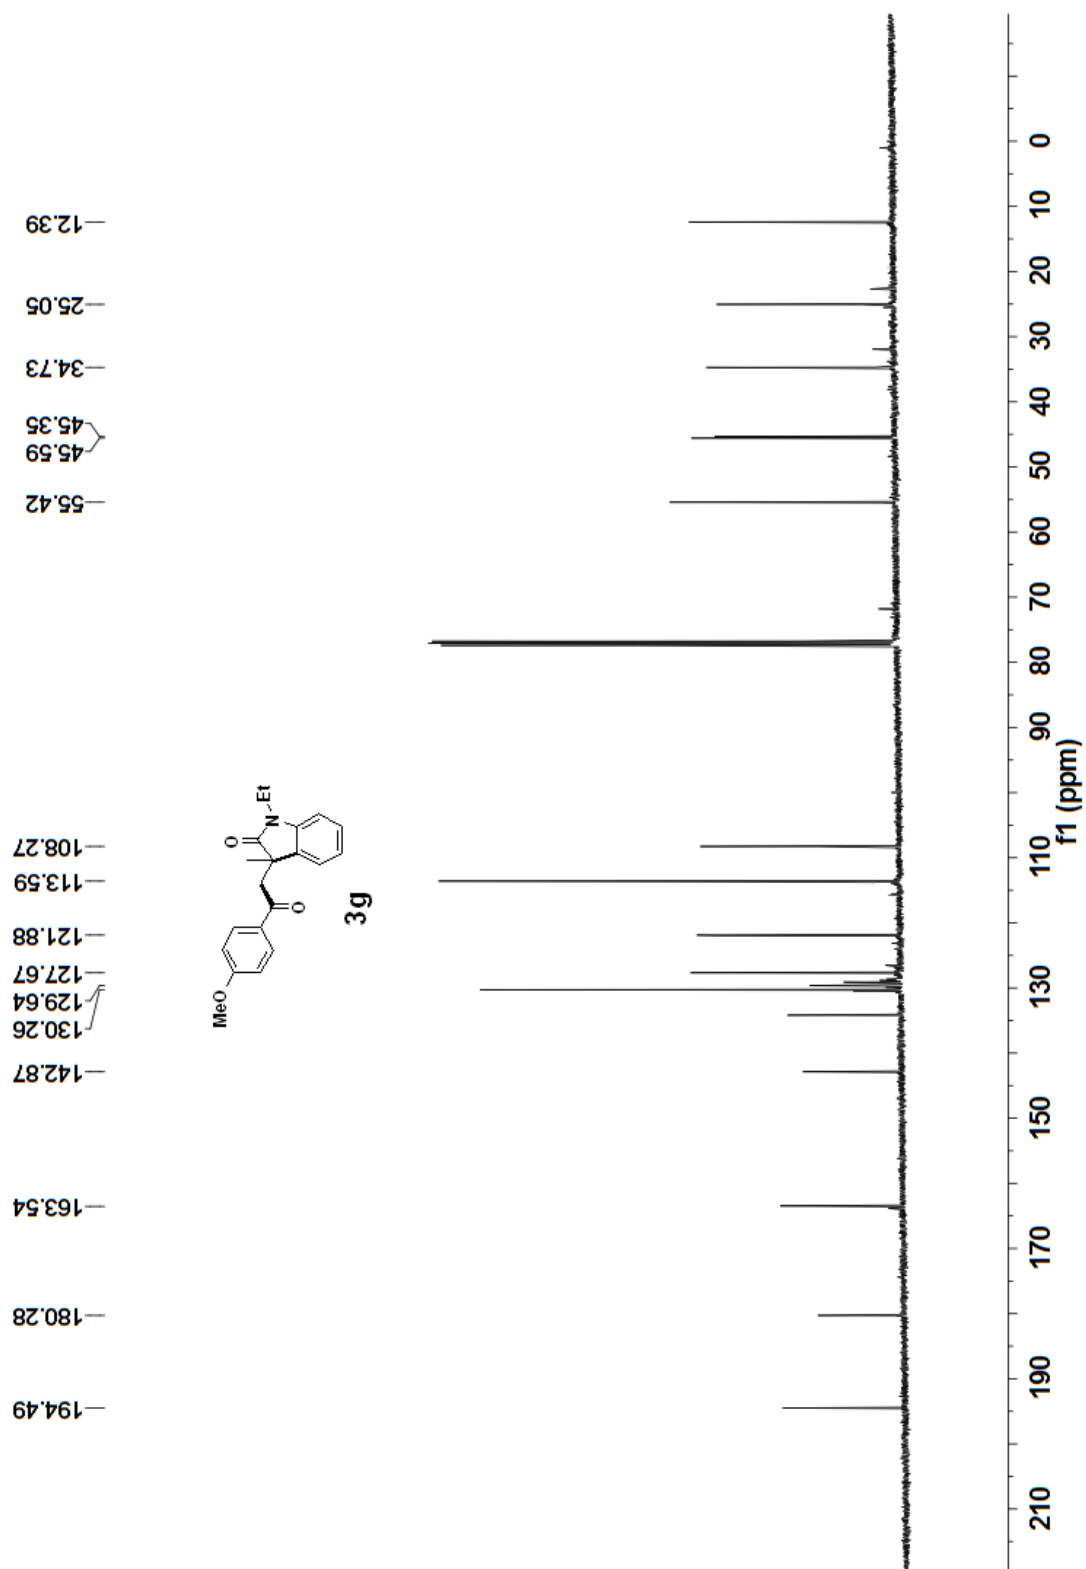

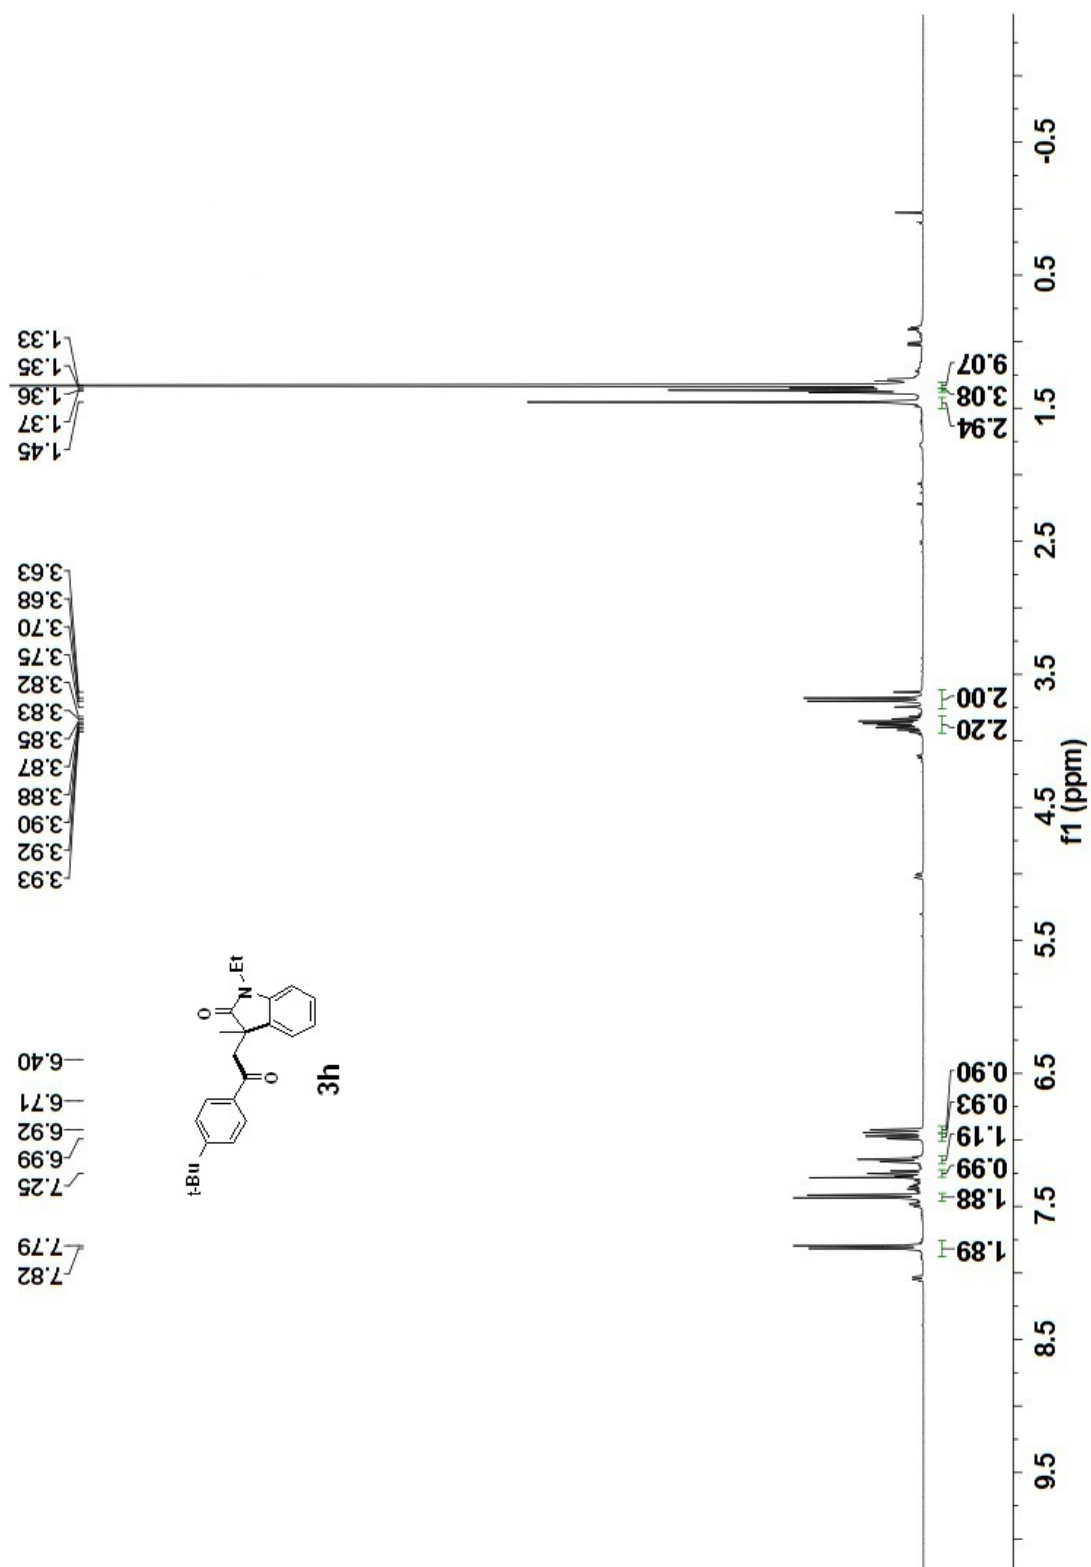

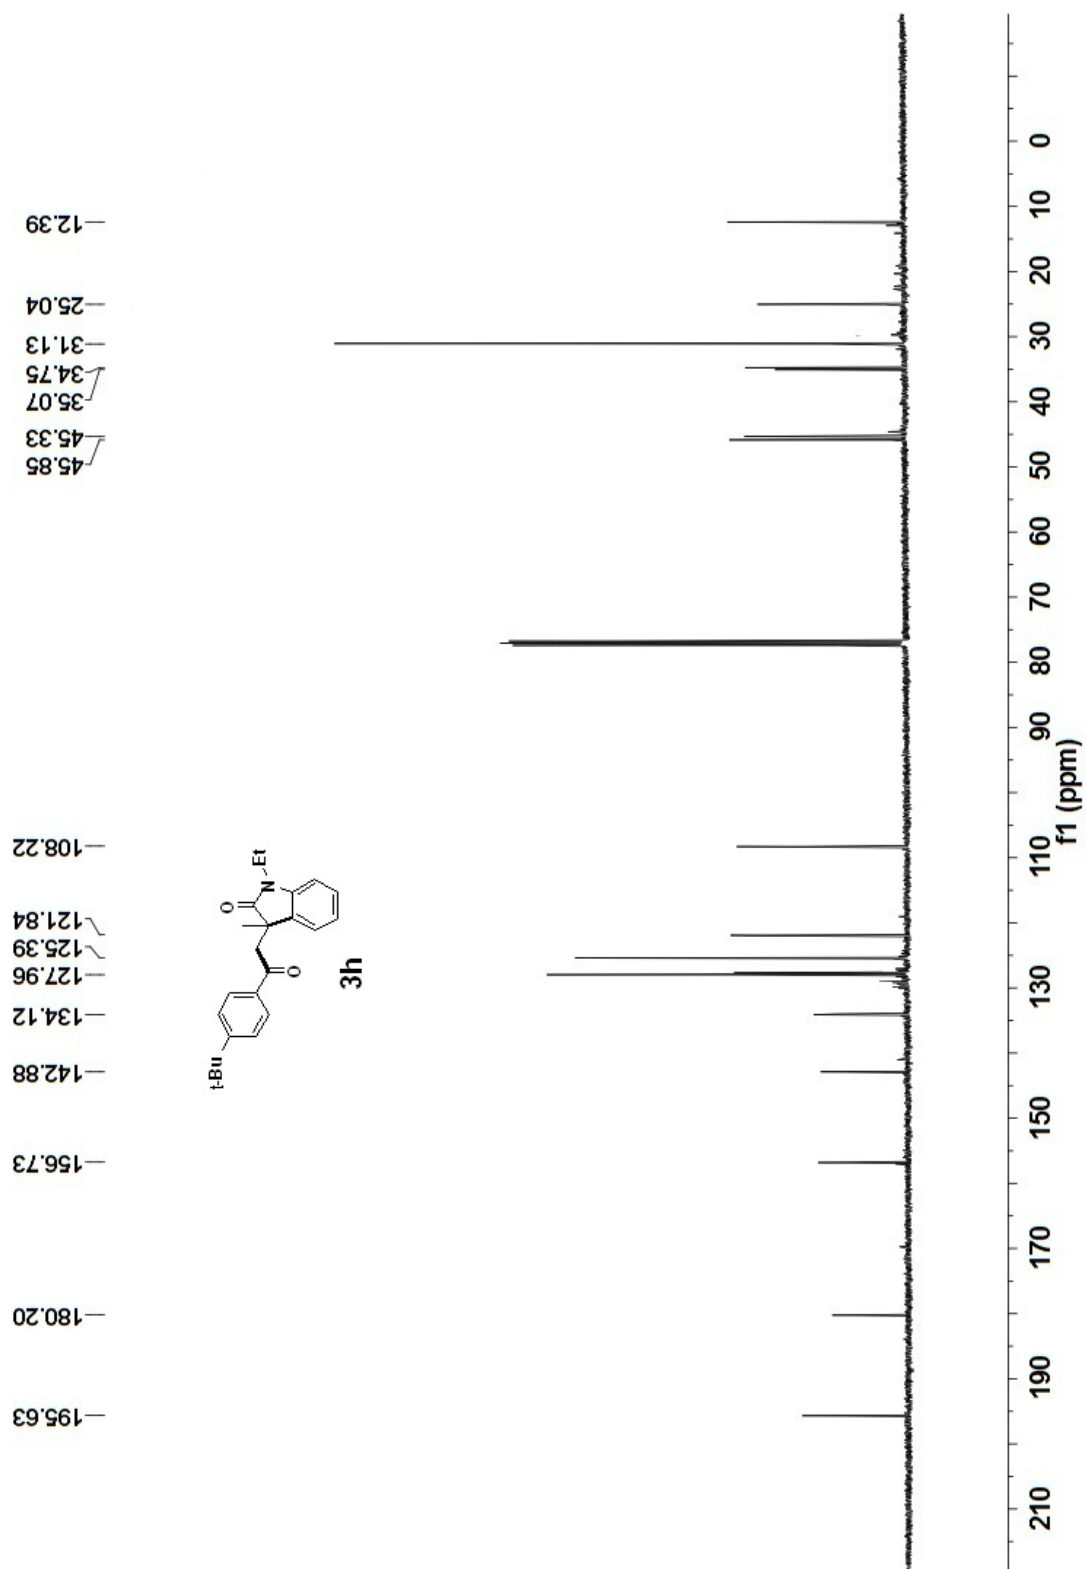

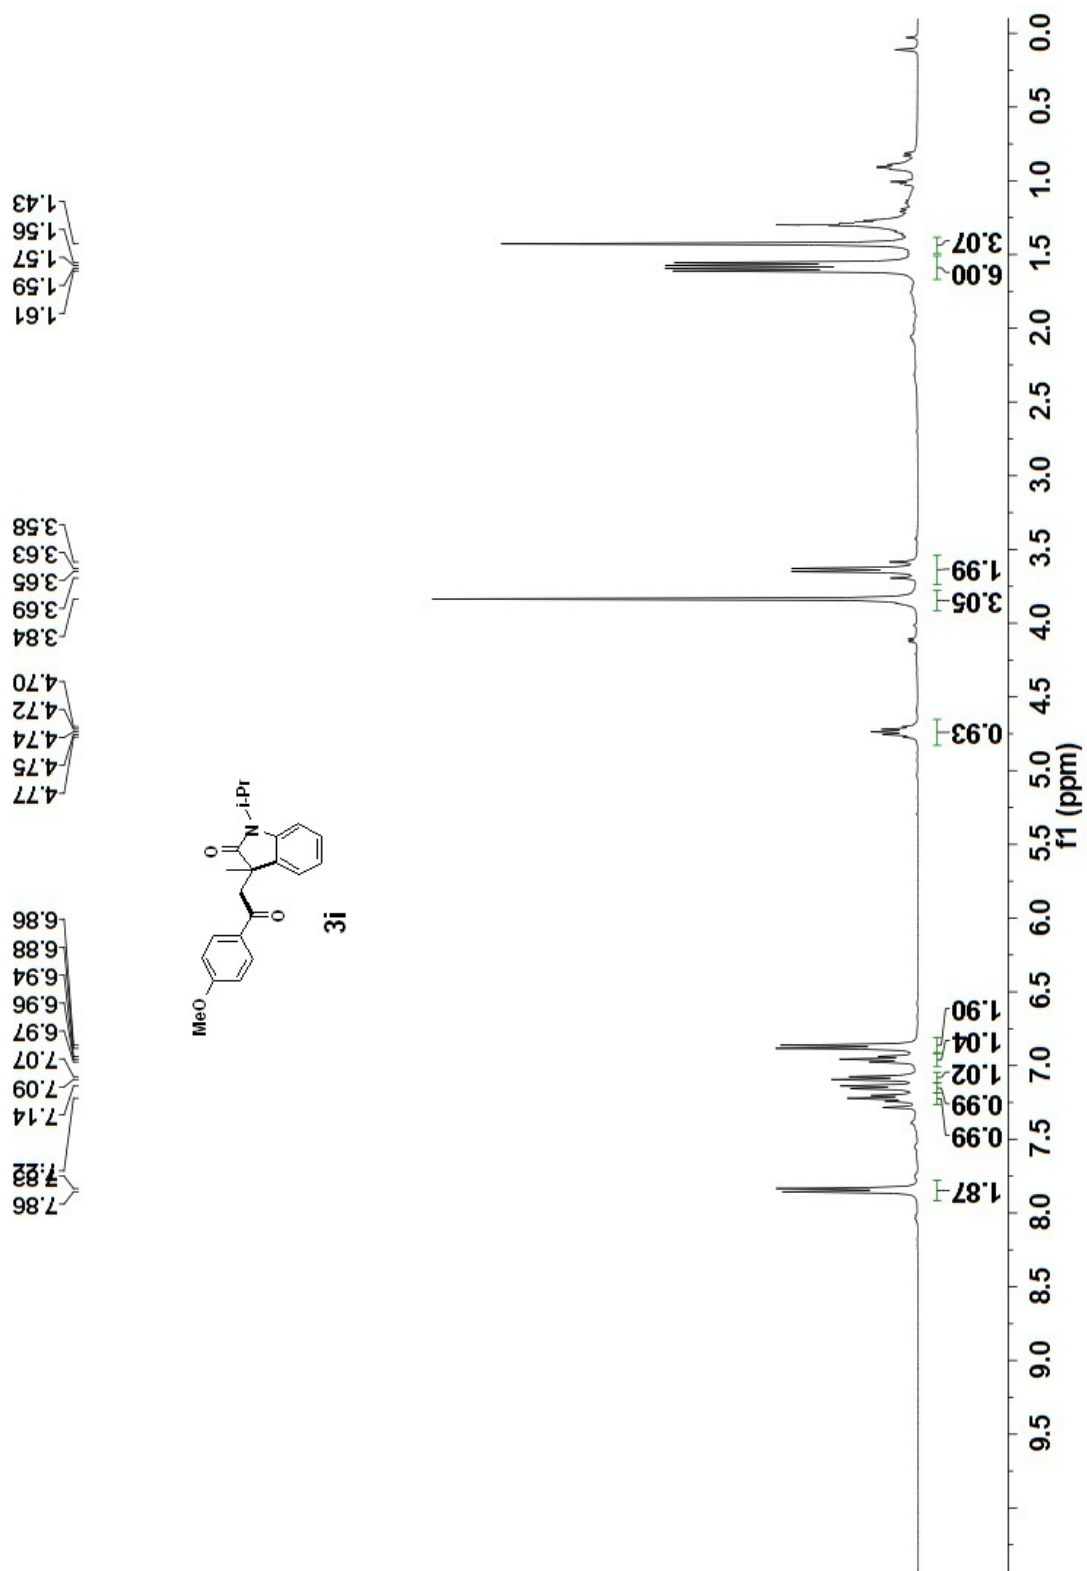

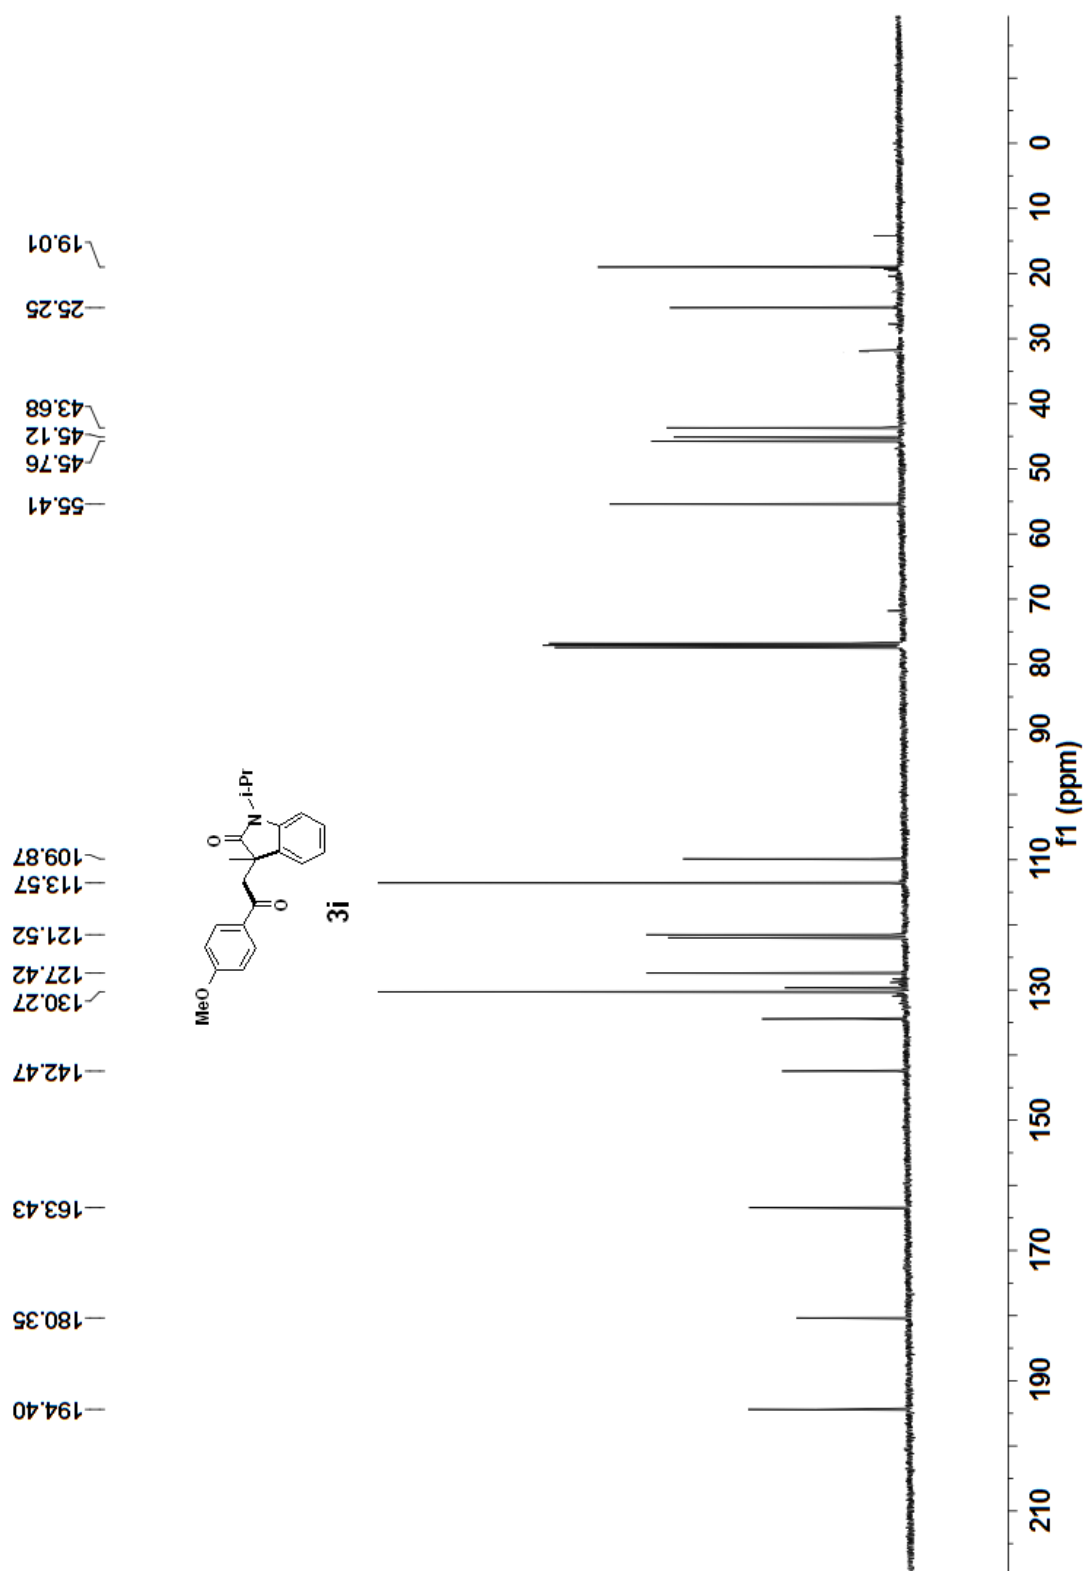

Supplement: c3ra46915h.pdf [file c3ra46915h.pdf]
